# Supplementary material for: miRConnect: Identifying Effector Genes of miRNAs and miRNA Families in Cancer Cells
Source: PubMed Central journal article supplement (PMC3202536; doi:10.1371/journal.pone.0026521), 2011-10-26

Figure S4

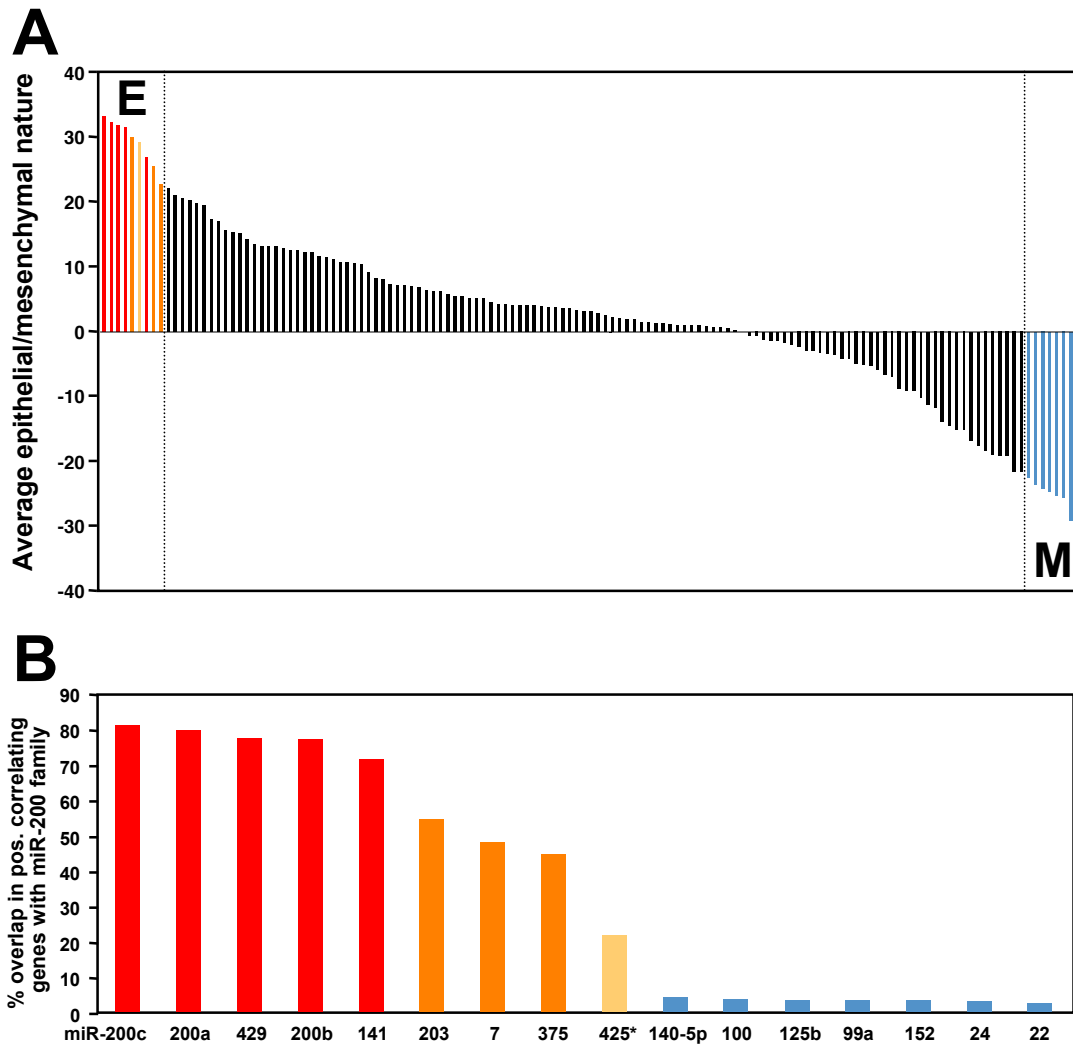

Supplement: pone.0026521.s004.pdf [file pone.0026521.s004.pdf]
