# Supplementary material for: miRConnect: Identifying Effector Genes of miRNAs and miRNA Families in Cancer Cells
Source: PLoS One. 2011 Oct 26;6(10):e26521. doi: 10.1371/journal.pone.0026521 (PMC3202536; doi:10.1371/journal.pone.0026521)
Supplement: Table S1 — Expression of miRNAs in 59 of NCI60 cell lines sorted according to numbers of cell lines with detectable expression. miR-429 was found to be significantly expressed in more than 30 cell lines (data not shown). (XLS) [file pone.0026521.s007.xls]

## Sheet: Undetectable miRNAs
Table S1: Expression of miRNAs in 59 of NCI60 cell lines sorted according to numbers of cell lines with detectable expression.
# of cell lines with expression
	miRNA ID	786-0 (Renal)	A498 (Renal)	A549 (Lung)	ACHN (Renal)	BT549 (Breast)	CAKI1 (Renal)	CCRFCEM (Hema)	COLO205 (Colon)	DU145 (Prost)	EKVX (Lung)	HCC2998 (Colon)	HCT116 (Colon)	HCT15 (Colon)	HL60TB (Hema)	HOP62 (Lung)	HOP92 (Lung)	HS578 (Breast)	HT29 (Colon)	IGROV1 (Ov)	K562 (Hema)	KM12 (Colon)	LOXIMVI (Mel)	M14 (Mel)	MALME3M (Mel)	MCF7 (Breast)	MDAMB231 (Breast)	MDAMB435 (Breast)	MOLT4 (Hema)	NCI-ADR-RES (Breast)	NCI-H226 (Lung)	NCI-H23 (Lung)	NCI-H322M (Lung)	NCI-H460 (Lung)	NCI-H522 (Lung)	OVCAR3 (Ov)	OVCAR4 (Ov)	OVCAR5 (Ov)	OVCAR8 (Ov)	PC3 (Prost)	RPMI8226 (Hema)	RXF393 (Renal)	SF268 (CNS)	SF295 (CNS)	SF539 (CNS)	SKMEL2 (Mel)	SKMEL28 (Mel)	SKMEL5 (Mel)	SKOV03 (Ov)
59	let-7a	6.74063	5.16268	5.67657	4.8505	6.66715	5.87659	5.48461	4.91817	6.02854	6.15646	4.92907	6.04577	4.94972	6.22189	6.24822	5.80643	6.86459	4.30549	4.36364	3.25159	3.68111	2.02141	4.37103	5.59277	5.44905	5.88571	5.98297	4.10979	4.99508	5.77967	4.32133	4.52171	4.58917	5.66091	5.28445	3.28623	6.31852	5.97196	7.64773	3.91993	5.28262	5.87731	6.82278	6.02927	4.68386	5.59805	4.97059	6.78629
59	let-7b	6.23666	4.51865	3.95468	4.02232	5.82131	4.82288	3.68193	3.10571	5.24396	4.8763	4.96506	4.47133	5.55619	3.76212	6.033	3.62652	6.41555	4.85724	0.813073	-2.2022	3.47374	0.913972	4.60914	4.82537	4.24811	3.3795	4.8568	3.23549	4.22951	4.07262	1.44533	3.80498	2.59368	4.06381	3.32871	3.09323	5.9827	4.8986	5.77294	3.0848	5.01119	5.53732	6.39535	5.222	1.83462	3.60842	3.33053	6.43061
59	let-7c	6.72585	6.0648	4.8207	5.06866	7.07296	6.45124	4.8002	3.88242	6.02353	5.09808	4.88854	4.56481	6.84577	4.73496	6.56759	4.43537	7.16251	5.31786	2.28111	-1.35043	3.94298	3.5965	5.13723	5.53302	5.66288	4.65782	5.44064	3.25119	5.18413	5.63569	3.78743	4.8856	4.75622	7.62513	7.73353	5.45672	6.2501	5.97661	6.36576	5.6852	5.47968	6.43142	7.39425	6.87106	5.00107	5.01483	4.92223	7.19328
59	let-7f	5.2455	5.72713	4.3124	4.713	4.89932	5.19238	5.75087	4.43272	5.00629	4.95109	4.0154	4.61679	4.24028	6.72489	5.12606	3.63776	5.56056	3.8058	3.41113	1.39179	3.06899	3.42012	3.91671	5.26786	6.32679	5.41057	5.48929	4.02846	4.1443	5.11381	4.51993	4.48968	4.09639	5.45611	5.39602	3.61866	5.26054	6.11092	6.36045	4.49889	4.778	4.38244	4.94807	5.24017	5.20341	4.05155	4.75985	5.45603
59	let-7g	5.7545	4.7792	4.3017	4.86898	5.49695	5.00922	5.93336	4.98269	5.44305	5.27077	5.31816	4.97892	5.42403	7.03763	5.2226	4.86046	6.31681	3.75764	2.55949	0.566389	3.97108	3.3061	4.37802	5.61562	4.49894	5.52612	5.77435	4.77484	4.93955	5.25829	4.72968	4.33182	4.95397	5.25007	5.98707	4.30566	5.49614	5.7462	6.4923	6.87317	4.49851	4.75565	4.93149	4.74949	4.71394	4.52564	5.49958	5.43559
59	miR-101	0.0349164	-1.15329	-1.04567	-0.915957	0.661782	-0.479238	-0.440183	-0.181917	-0.466065	-0.855983	0.0560163	0.169663	0.662722	1.65169	-0.160443	0.116413	-1.04933	-0.173793	0.422388	1.62014	-2.01258	0.545521	-1.40192	0.64755	0.0724425	-0.672107	1.37038	-0.494426	0.0400724	-0.731139	-0.684076	-0.328873	-0.611791	0.116554	1.30657	-0.217193	0.260417	-0.591068	0.831021	2.68283	-1.02979	-0.322732	-0.954657	-0.379152	0.373639	0.541139	0.814693	-0.189151
59	miR-103	4.20034	2.20441	3.24289	2.53695	3.71257	3.02403	4.96182	4.56599	3.48131	3.43454	2.80214	4.08247	4.2306	3.90708	3.95669	2.73427	3.08471	4.0213	4.29466	3.3883	0.578558	4.3788	1.94484	4.06308	4.89687	3.79106	3.53987	3.14638	4.48624	3.36961	4.36099	5.27776	1.99133	5.19726	4.22854	4.45878	4.38179	2.81117	3.74663	3.62747	4.25328	4.4461	2.59986	4.49474	4.62608	4.48151	4.02614	4.99233
59	miR-106a	3.38468	3.21386	2.87756	3.32546	4.27495	3.71352	5.72154	5.93726	2.37301	3.2419	4.60224	4.27163	4.88504	5.36596	3.89213	3.42849	2.89489	4.26314	3.28448	7.1799	2.46082	5.25429	2.86383	3.93709	2.31181	4.23116	4.73657	5.21431	4.79811	2.83612	3.35584	4.13655	3.72384	4.69616	3.6198	3.82383	4.05709	4.15519	5.09673	5.30038	3.52766	3.40361	2.93302	3.41982	3.44143	2.87424	4.33075	3.76117
59	miR-106b	5.30151	4.51698	4.69099	4.04085	5.5457	3.99072	6.61922	5.28349	5.12696	5.04599	5.31259	5.2247	4.99587	6.76003	4.19929	4.48538	4.33922	5.61193	5.89063	6.04856	2.20982	5.02638	3.46905	6.42832	6.29513	5.475	5.62687	5.88935	3.99196	4.50208	6.37631	4.27247	4.11461	6.29775	5.49295	5.36733	4.49206	3.86122	5.28114	7.12237	4.61619	5.08719	4.93446	4.39356	5.29852	5.33352	5.5512	4.16201
59	miR-107	-0.129329	-2.9911	-1.82984	-2.22106	-0.524271	-1.61905	-0.58676	-0.486924	-1.66203	-1.06929	-1.7569	-0.502525	0.312064	-1.45799	-1.20769	-0.761089	-1.95562	0.236924	-1.06354	-2.18339	-3.68108	-1.0218	-3.03577	-1.31841	-0.230261	-0.743008	-1.46047	-1.12771	-1.43384	-1.39691	-0.319531	0.290153	-2.91407	1.42947	-0.143816	0.938649	-0.843035	-2.62175	-1.30651	-2.67131	-1.30769	0.0877163	-2.83482	-0.47871	-0.400287	-1.86694	-1.80616	-0.97054
59	miR-125a	6.82332	6.43097	6.91674	5.36712	6.30415	6.62276	2.06884	1.05705	5.59727	6.96856	3.65856	5.48848	6.62454	3.84113	6.34859	6.93241	6.65005	5.24526	5.74467	5.63405	1.91816	1.34405	3.04083	5.02292	6.71952	6.56344	4.96637	0.332398	5.0559	7.65158	6.75294	5.92444	5.23159	5.35285	5.87453	6.53794	5.94918	4.90599	5.61844	0.195932	6.26516	5.07579	6.65577	6.44813	4.88018	5.15086	4.13826	7.51258
59	miR-130b	3.16681	2.15342	1.99463	3.24275	2.71242	2.51331	5.35532	2.90529	3.07311	3.5988	3.419	3.61456	4.0601	3.46083	3.86205	3.28164	4.37528	2.59718	3.31918	6.86478	1.86668	3.77642	1.57574	3.58483	2.58405	4.14878	2.91552	4.63443	3.82686	3.1011	3.17679	3.96809	2.71171	4.92786	3.35453	3.89971	3.79962	4.65282	3.1624	3.51663	3.54484	5.42439	2.86645	3.00934	2.81882	3.2951	2.88629	2.28647
59	miR-132	1.28334	2.25506	2.44287	-0.301527	1.92411	-1.31211	-0.868057	-1.49194	0.084812	1.34356	1.87956	1.27084	0.193557	-2.88652	0.193221	1.162	1.03842	-1.27129	1.06721	1.08975	-1.64587	2.35611	-0.264383	0.380629	0.958198	1.75786	2.41668	-2.37985	0.0716782	0.215602	2.99598	0.169729	1.6842	1.74823	-1.58325	-1.31309	-0.482579	-0.485996	-0.627749	0.140407	-0.888934	0.359721	1.34018	0.0886384	1.14104	1.25643	1.72186	0.145148
59	miR-135b	2.75476	3.41051	0.749577	2.60827	5.43237	2.24393	-0.242471	5.36808	3.82442	-0.286694	4.19112	4.11488	1.59293	-3.72382	2.02098	3.3775	-1.30201	3.45572	3.33521	2.06795	-0.221874	-0.0384338	1.79863	4.8124	4.09334	2.77124	2.34562	-0.393222	1.83677	3.68481	-1.10978	5.7803	-0.639188	0.32619	4.75554	4.33105	3.40048	1.70767	1.65103	-3.34965	2.06007	-1.66145	1.89464	-0.596319	3.42284	2.56855	4.45094	4.324
59	miR-140-5p	2.83609	2.88038	3.13038	3.58504	4.72081	3.23483	4.26809	0.122681	3.23401	2.70423	0.925153	2.38471	3.50342	4.50048	3.54325	3.01009	4.44059	-0.223923	3.47052	3.64489	-0.786987	2.91649	1.46605	3.96212	1.44018	3.15963	3.5667	2.22792	2.84394	5.02525	2.48168	0.744235	2.30981	2.24506	0.346545	-0.401344	2.85834	2.86921	2.26944	3.15505	2.87449	2.95921	3.62825	4.9416	6.33599	3.16207	3.24072	3.6914
59	miR-148b	0.872347	-0.0223406	0.254672	-0.0426983	0.797109	1.1744	1.66179	1.34858	1.1963	0.687382	0.0998685	1.46763	1.24498	1.58381	-0.276641	0.457039	0.760112	0.735317	1.46538	1.0904	-1.67159	0.441617	-1.25243	1.46314	1.79192	0.214105	0.0708252	0.529407	1.08282	1.18365	1.85256	1.25588	0.849837	1.21061	1.63832	1.43732	0.803165	-0.511158	1.14184	2.28243	0.00391862	0.925804	0.677004	0.846779	0.90362	1.01645	2.18174	0.339228
59	miR-15a	4.2004	3.53332	2.96726	2.94668	5.03407	3.14138	6.49	5.50689	4.23809	3.77592	4.83148	2.82024	4.46398	6.59877	4.08699	4.52458	3.9353	3.88167	3.94799	4.37495	1.54457	4.68368	2.38959	4.97805	4.40659	4.87905	4.2075	4.84784	4.07723	4.64578	4.12816	4.58487	2.76585	3.18988	3.95619	3.45925	4.42281	3.96426	3.83989	4.64484	4.67731	4.79907	4.84146	5.42878	3.85488	3.88421	4.11866	4.41629
59	miR-15b	5.9312	4.53622	5.26541	4.01776	6.08478	4.68992	6.60582	6.14086	5.45524	4.64974	4.41789	4.98821	5.15483	5.94152	5.44832	6.10664	5.61381	5.09147	4.79688	5.9112	2.90867	5.39138	3.47725	5.61999	4.89473	5.75613	5.82221	4.95515	5.56724	4.65734	6.04421	5.82737	3.59912	5.87831	6.69439	6.04086	6.73376	4.51421	5.47074	5.87676	5.99178	5.55933	6.20598	7.04568	5.8142	5.71341	4.77099	5.55387
59	miR-16	7.33027	6.80008	7.14134	6.31406	7.97895	6.27238	9.25834	8.09219	7.39149	6.33783	7.29353	7.13538	7.46724	8.71288	7.13755	7.86977	7.97314	6.42409	7.19413	7.94415	5.17232	7.19807	4.84031	7.50591	7.31139	7.75881	7.56181	7.80214	6.83476	7.51256	7.49591	7.43863	6.37584	6.66233	7.6458	6.85725	7.8031	7.01323	7.017	9.01603	7.40046	7.50912	7.47876	8.03687	7.33045	7.37888	6.84179	7.77918
59	miR-17-3p	-2.47171	-1.23793	-0.989484	-2.04665	-0.0867339	-2.05063	0.849194	0.145554	-1.30391	-2.18952	1.42121	-1.64014	-0.357774	1.73121	-1.08344	-1.77333	-1.57016	-0.978792	-1.23105	3.29365	-0.744225	-0.184116	-2.0511	-0.858485	-0.710826	-1.32921	-0.82073	0.903273	-0.159013	-1.01379	-1.03577	-0.754748	-0.0127965	-2.86102	-0.949052	-2.24217	-0.150724	-0.498456	-0.358942	2.77127	-1.47987	-2.69519	-1.64181	-1.32088	-1.80348	-0.56356	0.272552	-1.70189
59	miR-17-5p	3.44938	3.06269	3.11924	3.16362	4.45334	3.72772	5.52935	6.05198	2.54407	2.9768	4.5227	4.32967	4.76785	5.41078	3.68202	3.13545	2.66018	3.51384	3.62348	7.43204	2.38275	4.93029	2.73777	3.85445	2.21718	3.92806	4.73723	4.98105	5.03738	2.70811	3.20548	3.96	3.702	4.76985	3.32194	4.03733	4.74699	4.1928	4.80538	5.4915	3.44053	3.34128	2.46393	3.77073	3.96741	2.96548	4.37527	3.89249
59	miR-18a	1.5092	0.904854	1.03057	1.333	1.94781	1.5693	3.80249	4.14975	0.739169	2.37684	3.26523	3.50785	2.66224	3.53835	2.24331	0.874507	0.186693	3.93233	2.11367	6.69209	-0.97835	3.2112	2.64247	2.14793	1.2226	2.02833	2.18293	2.95516	3.14754	-0.162408	2.27443	2.89786	1.53673	2.95871	1.97729	2.62375	3.17489	1.96863	3.35779	4.3258	3.09843	1.88989	1.34863	2.18362	2.11749	2.46217	2.75252	0.630094
59	miR-181a	5.70866	4.21517	3.00493	4.87737	2.37621	5.60604	8.5575	2.81806	5.4799	5.10213	1.86323	2.92443	2.63084	8.56396	4.86945	5.57741	6.04798	3.7852	1.58941	-0.853753	2.87422	4.9599	4.17687	4.3807	5.25298	5.17248	3.55242	6.78027	3.58763	5.02917	3.68542	6.93075	3.87743	4.11376	3.23076	3.72315	4.60058	4.70815	3.83242	4.13067	4.38954	4.83873	4.22254	4.31622	5.09486	3.44905	3.67305	4.84726
59	miR-181b	5.85957	5.17295	4.44929	6.40212	3.98596	5.93555	8.41573	3.80305	6.20142	5.71952	2.69992	3.92705	2.25212	8.15075	5.12862	5.48448	5.37106	4.56721	2.36133	0.597417	2.87102	5.81259	4.88873	4.49048	6.48324	5.61932	4.64899	6.37004	4.91781	4.75058	4.82302	6.43164	4.45392	5.12721	4.15053	4.1315	5.59719	5.32856	4.36327	4.663	5.20009	4.77636	5.3808	5.8573	6.23251	4.26479	4.58485	5.249
59	miR-182	4.13869	4.12065	2.98062	2.89686	1.95467	1.69658	-0.135305	2.35431	4.24259	3.69821	2.90551	4.21026	2.90199	-1.08409	2.46637	2.84742	2.05562	2.39961	3.98501	4.86731	1.00199	1.97529	1.06408	0.0798898	4.50099	2.75634	2.48773	1.75774	3.0254	3.39102	4.2364	2.31117	1.32157	5.22206	3.57843	3.05181	2.64883	3.59757	5.05564	3.70527	2.16268	1.56135	2.58277	0.346633	-0.0696009	1.88553	2.20368	2.38393
59	miR-186	3.80235	2.83814	2.4319	2.04175	4.36527	2.98672	4.84246	2.48877	3.00311	4.1022	3.17236	4.73735	3.5861	4.68847	1.99368	3.74991	3.75842	4.06724	3.77075	5.34819	1.28065	3.72456	4.62724	3.13544	2.61294	3.34875	3.92782	2.92464	3.5487	3.41568	4.05661	3.1317	2.80951	3.92236	3.67649	4.06724	3.23155	2.96016	5.04599	4.88327	4.08505	3.55399	2.89683	4.35233	4.71102	4.14236	4.20989	2.37409
59	miR-188-5p	-1.51314	-1.43274	-1.82714	4.52775	-0.893947	2.16694	-0.87096	0.143332	-1.76868	-0.85883	-0.647952	-0.504117	-0.99578	-1.39921	-0.886753	-2.61672	-3.26918	-0.170404	-0.541014	-0.771141	-1.34098	-1.19825	1.49383	0.479378	-2.00963	-2.00133	1.4278	-1.11492	-1.75185	1.1943	-0.0238458	-0.586033	-1.21456	0.973303	-1.85195	-0.108911	-1.13815	-1.69622	0.0997803	1.05348	-1.2029	-0.485871	-1.62958	-0.670796	0.384232	0.807119	0.722667	-1.9278
59	miR-191	4.60435	3.106	3.44827	2.41734	4.87586	3.36921	5.68951	4.24405	4.75016	4.5326	4.3904	4.94338	5.15944	5.86761	4.3314	4.39454	3.68844	3.17659	4.43298	5.23539	2.49423	3.86627	3.15249	3.78524	4.60025	3.81904	2.75994	3.10458	3.63132	3.99486	4.9304	4.90185	3.72705	5.55959	5.27315	3.51675	4.05014	4.04569	4.89001	5.29973	3.25553	3.50085	3.50543	4.30537	4.1269	3.42397	3.46996	3.85896
59	miR-192	-0.113206	2.23143	6.56582	3.68055	-1.18685	0.33905	0.85308	7.62432	3.12413	0.23972	8.05387	-0.604246	2.76903	0.146557	0.205015	0.676156	0.61918	5.46203	1.41792	3.03165	6.17971	0.356991	1.94571	-0.905065	0.871813	1.28043	1.73072	3.04455	0.428255	1.74512	-0.176586	1.07614	2.22674	0.62935	-0.132006	-0.256835	3.6783	0.662286	0.779757	1.21207	-0.875433	-0.926841	1.34672	-1.98341	-0.571383	-0.324561	-0.229886	0.373824
59	miR-194	-0.279196	1.24553	6.00888	2.71181	-0.926127	-0.254418	0.339158	7.62143	2.79525	0.240637	7.3968	0.0284723	2.45884	-0.986072	0.00744591	0.291799	0.342848	5.27822	0.647289	1.82936	5.47269	-0.273306	1.70661	-1.17889	-0.00935474	0.747223	1.20068	2.60247	0.00548594	1.71638	-0.699366	0.676843	1.53468	0.146256	-0.920415	-0.74516	3.16233	0.574819	0.134577	0.826284	-1.29166	-1.01616	0.637873	-3.06031	-0.876697	-0.799744	-0.57388	-0.19045
59	miR-195	3.21544	4.05147	1.88888	1.79128	5.10363	1.33138	4.49598	4.95457	3.82007	2.0645	4.28963	1.21223	3.98348	4.93086	3.46994	2.08034	5.93109	2.00292	3.34745	4.11931	1.37045	3.01765	2.34345	3.26601	4.45639	2.6372	3.04861	4.26366	1.90129	2.76524	2.39051	4.44822	1.95781	2.2235	3.14938	2.30478	3.83318	2.63885	3.02626	4.97989	3.55007	4.8441	1.38245	2.99071	0.731754	2.99951	1.74433	2.55368
59	miR-197	3.94209	1.82	1.35052	3.80464	3.5894	2.45374	3.18091	1.37414	2.18642	2.8224	1.14363	3.78786	2.03198	3.61358	1.13761	2.82488	3.15378	2.28721	2.63038	3.90432	0.601543	2.82588	2.42318	2.34986	2.8535	3.42209	2.4298	1.07254	2.68751	2.35475	2.94243	2.08757	0.501445	3.5932	2.12723	2.19132	1.7539	3.06108	2.94824	1.27789	3.65691	2.64066	2.21248	3.45591	4.14501	2.88038	3.02447	2.99555
59	miR-19a	5.45847	5.34483	5.86232	6.26262	6.27749	5.94904	8.55668	8.8629	4.7265	5.75198	8.10543	6.97816	7.42393	8.2161	6.43291	6.755	6.24262	6.89476	5.87171	10.6463	4.49321	7.71962	4.50149	6.20671	4.94572	6.70337	7.01138	7.94673	6.76234	4.90474	6.18811	6.04002	7.39956	6.74051	6.00849	5.92178	6.92796	7.19364	8.11788	8.19005	6.15402	6.74121	5.30628	5.97387	6.47791	6.23549	7.48249	6.15991
59	miR-19b	6.13486	5.96124	6.69865	6.95835	7.1697	6.5707	8.96955	9.08174	5.47299	6.20679	8.3993	7.24656	7.99862	8.95045	6.94557	7.27379	6.43135	7.39976	6.33501	10.7949	5.48267	8.38634	5.85715	7.06805	5.76543	7.12294	7.81002	8.48823	7.81682	5.9993	6.47972	7.0728	7.80805	7.25993	6.66899	6.64803	7.47927	7.51399	8.52643	8.87369	6.88201	6.93881	6.32971	6.6148	6.83891	6.58077	7.98648	7.00362
59	miR-20a	6.61152	6.79615	6.9784	7.5717	7.61266	7.0303	9.36316	9.39393	6.28177	6.71686	8.7253	8.02576	8.11281	10.0819	7.17876	7.21595	6.42857	8.0671	7.14885	11.7193	6.42334	9.10843	7.78148	7.19555	6.7183	7.60715	7.69505	8.86201	8.56643	6.65643	6.66718	7.59349	7.97381	7.33297	6.74409	6.99072	8.32709	8.98412	8.69053	9.82107	7.40315	6.7008	6.50257	6.89361	7.28756	6.88381	8.30695	7.42104
59	miR-200c	2.2804	2.61773	1.07274	2.89862	0.258119	1.67273	0.529174	7.66018	6.93665	2.2458	7.66818	7.92469	7.80979	-0.584795	3.00452	-0.35284	-3.80298	7.31746	4.60771	-0.544742	6.94482	0.616019	2.80502	-0.937171	8.13397	-0.422282	-2.72096	3.77408	0.61284	-0.167159	-0.352732	7.89851	2.8244	-1.13018	8.16935	5.77204	4.64559	1.40085	1.8366	0.77682	3.2823	-2.97264	-1.99595	-2.74452	-1.4918	2.90156	-3.04437	-0.190845
59	miR-21	8.81662	8.95177	10.509	9.13869	8.52565	10.4171	6.13171	8.08116	10.2762	10.1191	7.66236	8.7632	7.83656	6.44839	9.51828	9.92734	9.07377	6.96281	8.20678	6.48513	6.06979	8.52106	5.28957	8.38694	8.5808	8.94464	6.93859	4.67925	8.33029	9.55779	8.6998	9.25916	7.70229	9.57446	6.62901	7.2788	8.80004	9.10729	8.57464	6.38296	5.3243	7.616	10.5652	9.40265	8.00073	8.5447	8.77709	9.88469
59	miR-210	4.87356	3.66981	2.24143	2.1807	1.57675	1.20892	3.07542	1.13757	3.8251	4.0307	1.35536	3.48528	2.97959	-0.715915	2.44614	3.19813	1.47674	1.82063	3.67682	2.23772	1.54429	3.16856	1.64629	-0.30238	2.36613	4.11859	1.2833	1.10016	1.6134	2.81529	1.60351	2.68414	1.67526	3.0555	1.28682	2.10153	4.74239	1.68444	3.80179	0.715502	5.04713	3.74555	2.32398	4.43946	0.136004	2.26347	2.38545	3.94142
59	miR-222	7.13586	6.71598	6.81324	6.24886	6.38533	6.041	5.60783	6.77762	6.2534	6.41921	6.12068	8.46773	6.8362	6.56928	8.15554	8.70628	7.6523	7.48152	7.92882	2.90472	4.17829	8.677	7.25804	6.24819	3.12766	9.76496	7.14335	4.18849	8.27446	7.67621	5.4731	6.95172	4.67761	8.56775	7.55388	7.00482	7.66756	7.33159	7.50237	3.58204	6.55904	8.87571	8.18602	5.54503	7.1929	7.40732	5.68999	7.02431
59	miR-23a	3.67566	3.53301	3.31596	2.02535	4.30758	2.94346	-0.567513	1.38657	3.36625	2.33537	1.71569	2.36525	3.83669	3.64849	3.01351	3.98711	4.89524	1.88759	1.39765	1.32484	0.548356	3.01624	1.96627	2.60394	2.85628	3.13658	2.98294	-1.78627	3.64892	3.34996	3.14371	3.96637	1.16662	3.12406	2.85906	3.68168	3.08458	3.11563	3.34678	3.98487	2.97776	3.92015	4.74773	2.75737	3.14171	3.3642	2.26123	4.81811
59	miR-23b	4.62871	4.18357	5.61044	2.54707	4.26393	4.885	1.09184	5.04553	5.52925	5.59406	1.502	2.20118	3.5493	1.99545	3.86299	3.69882	5.25516	2.88339	7.34252	2.17216	2.69169	1.93698	2.09406	3.52969	4.4275	4.17781	2.36462	0.298981	0.934817	6.04565	2.86725	5.52046	2.39858	2.53428	5.21322	3.66013	4.27526	1.60825	3.30498	1.83028	2.91992	3.5374	4.51434	4.74004	2.05759	2.61361	3.06254	4.32241
59	miR-24	7.38418	7.15046	7.62685	5.83627	7.46706	7.55015	3.47968	6.60069	7.00873	7.45218	5.65444	6.13846	6.71785	6.63432	6.61927	7.51845	7.77304	5.5952	7.84981	5.36723	3.86706	7.56821	4.63186	6.43654	5.29833	7.4852	6.49238	1.8817	7.19312	7.92972	7.34302	7.06396	5.51773	6.95551	6.81165	7.30027	6.79916	6.35594	7.38455	7.05829	7.00527	7.6713	8.05847	7.31199	6.69674	7.15905	6.10968	8.27784
59	miR-25	6.13413	6.12237	5.65161	5.19619	6.24871	4.77104	7.59615	6.17354	5.91837	6.03698	5.88883	6.82387	5.53142	7.63448	5.27028	5.97303	5.84174	5.80636	6.49433	7.89861	4.20681	5.177	4.5793	7.4742	7.62565	6.79201	6.91761	6.71294	4.50945	4.6187	6.46256	4.94995	5.27905	6.82119	6.12677	6.00818	5.13561	4.8731	6.29651	7.71204	5.40085	6.02975	6.11938	5.21666	6.29129	6.40919	6.53144	4.03254
59	miR-26a	6.1313	6.0986	6.73214	7.44619	6.87741	7.1964	7.12751	5.23772	7.12043	7.07112	5.07896	6.44024	6.86012	7.30736	6.45242	7.13651	6.86452	6.03915	7.57871	6.85163	4.6612	7.06467	5.93615	7.49058	7.7858	7.235	6.1113	5.08977	6.54181	7.60004	6.88653	7.0317	6.02284	6.4695	7.57872	5.88507	6.93559	7.80986	6.49322	7.65617	5.9156	6.35394	6.73736	6.83551	6.55245	6.78701	6.34045	7.28412
59	miR-26b	5.86418	4.78373	5.48268	5.07922	4.82675	4.39645	7.34872	5.2855	5.69865	6.19694	4.99638	5.52282	5.80815	6.57162	5.07723	5.40928	5.21312	5.10394	6.11265	5.85197	3.68086	5.66101	4.79574	5.36393	6.19052	5.03436	5.66775	4.40997	4.98516	4.60529	6.87429	5.20334	5.33022	6.19384	6.26694	4.39621	5.92305	5.65111	6.0206	5.3503	4.75345	4.9627	4.9394	5.66934	5.04473	5.73867	5.15874	5.91458
59	miR-27a	6.85468	6.39428	5.53817	5.72235	6.42105	6.68865	2.59835	4.41659	5.75587	6.06253	4.5454	5.37832	6.6986	7.18953	5.96225	6.565	6.75458	4.70244	4.74946	4.98594	2.26239	6.14063	6.90714	4.15847	5.12268	6.2634	5.92403	1.22189	6.33307	6.76885	5.50974	6.50185	4.35243	6.41445	5.41448	6.85814	5.68463	5.94627	6.33079	5.63762	6.32659	7.20521	8.07919	5.61322	6.69453	5.24727	4.90875	7.91709
59	miR-27b	5.25678	3.57813	5.9136	3.96545	4.63346	5.4793	1.15332	5.97472	5.10562	5.83245	1.63275	2.21101	3.77605	1.9482	4.24365	4.11257	4.94063	3.12813	7.12798	1.75972	2.14441	1.73496	2.70313	3.0987	4.69478	4.83409	2.36545	0.434776	0.592331	5.32424	2.41271	5.49712	1.95997	2.90305	5.3028	4.20961	4.71117	1.35767	3.15933	1.57777	3.09206	4.25714	5.55565	5.06072	2.54301	2.08403	2.67264	4.86278
59	miR-29a	6.18846	7.46532	6.53675	7.15767	6.69163	6.09596	5.49535	5.77054	7.7937	6.18646	7.32098	7.08455	7.1844	5.76456	6.63195	8.5561	7.13667	6.33856	3.83386	3.64772	4.55519	7.21196	6.55427	8.27137	4.50728	7.74547	7.92486	5.16566	8.25928	7.28479	6.39173	5.63831	7.38588	5.55043	4.28665	5.87473	6.98276	7.84182	6.71289	9.05295	6.1223	7.80485	7.01085	5.652	7.4736	8.52062	7.77375	5.59744
59	miR-29b	2.00208	2.15292	2.538	3.17211	1.71558	1.27335	0.465197	2.18593	3.60287	1.68357	3.0902	3.95035	3.83117	0.881978	2.3025	3.82962	0.484133	3.22407	-0.0689947	0.141245	-1.86769	3.40102	2.73979	4.30219	0.0937233	3.35764	3.82381	-0.444594	3.89889	3.09484	1.94852	1.74994	1.97675	1.74585	0.0454883	2.37764	2.94445	3.63115	2.4325	4.17858	1.38584	3.82063	2.34103	-0.379297	3.57521	4.18788	3.7436	1.26682
59	miR-29c	2.7827	5.62911	3.58492	4.25631	2.39763	3.8099	4.88195	2.78505	4.46967	3.91257	3.87218	3.4244	5.53468	5.32098	4.11988	4.19478	4.85389	3.74288	2.35094	2.0242	1.89682	3.73671	4.17922	5.97898	3.40748	4.51557	4.79382	5.04713	3.37816	4.0022	2.57569	3.94976	4.68391	2.32592	2.16571	3.7581	4.55908	6.17908	4.64915	8.2573	3.66412	4.95614	3.11846	1.5963	4.6559	5.33048	3.50679	2.70382
59	miR-301a	2.90208	0.639178	1.52108	1.81693	1.88737	2.94643	3.81601	1.74433	2.64026	2.40772	1.01672	3.31436	3.20017	1.36063	2.35327	1.3817	1.10835	3.26447	3.7234	2.5356	-1.75575	3.52222	1.47953	1.76487	4.85625	2.2934	1.2496	2.33924	4.41486	2.25114	3.31973	3.92135	0.418885	5.61674	3.42736	1.85636	2.91388	2.77581	2.92269	2.2703	1.90311	3.85208	0.627114	2.62529	2.59711	1.73726	2.35665	2.04683
59	miR-30a-5p	5.86387	5.81803	5.61857	5.8907	5.21641	6.83514	4.99647	3.49397	5.18275	5.61988	4.14394	4.25269	4.17098	6.01682	5.37777	5.66902	4.87569	5.01104	7.95331	4.92874	3.75847	4.21233	4.59573	6.29368	5.61363	5.56958	6.16159	4.06561	6.02489	7.20141	6.17868	5.96711	4.44506	6.30209	5.18542	5.68318	5.63383	6.21076	4.76135	6.57853	5.04296	4.48075	3.73415	4.03369	5.23279	5.76511	7.3239	6.31738
59	miR-30b	5.55975	5.13341	5.09462	5.85514	5.31446	6.28632	5.43611	4.12177	4.62193	5.69499	3.8619	4.4831	4.65853	5.57873	4.70822	5.37724	4.59455	4.84117	6.3989	4.86744	3.75847	4.61325	5.08863	5.62609	5.12088	5.79198	6.22182	-0.672179	5.4213	5.97495	5.72546	5.49415	3.78606	5.87741	4.94006	5.61091	5.37397	5.45725	4.70886	5.16831	5.15526	4.44351	3.9559	4.43015	4.9995	4.98462	6.70011	5.90097
59	miR-30c	6.71416	5.963	5.86046	7.46022	6.05404	7.70601	6.46602	4.987	5.25118	6.55777	4.39632	4.8772	5.69133	6.39536	6.14146	6.46646	5.32148	4.58334	8.18097	5.84306	3.75847	5.4287	3.41511	5.86171	6.04724	7.09632	6.53301	5.00583	6.35626	6.44674	6.628	6.14071	4.63301	7.44052	6.39711	7.00843	6.24032	5.6469	5.14002	6.05318	5.40438	5.92391	4.94202	5.12393	5.57546	5.33011	6.32786	7.08678
59	miR-30d	3.35501	3.0119	3.29218	2.21613	3.29997	3.21222	3.35572	2.20076	2.87723	2.65898	2.65207	2.29223	2.5438	4.1708	2.27331	3.33609	3.29029	3.5256	3.99501	3.37941	3.75847	2.18756	0.899715	5.07072	3.56823	2.9078	4.47396	2.66814	2.95205	4.68457	3.30803	3.53055	1.98548	3.06865	2.4695	2.49941	3.20982	2.66869	2.80596	4.83859	3.03047	2.28773	1.36438	2.0294	3.51041	3.99489	5.78505	2.90605
59	miR-30e	0.831905	0.743119	0.92741	0.701889	0.888319	1.29147	0.828237	-0.76506	0.627142	1.16877	1.05759	-0.658299	0.204656	2.35601	0.503235	1.3802	-0.0866896	-0.099032	3.49508	0.78416	3.75847	-1.45022	-2.97933	1.43096	1.22562	0.298649	0.476863	0.656952	-0.180964	1.99948	1.43283	1.21795	0.297662	1.28485	1.47327	0.863958	-0.0619194	0.394037	-0.234526	4.02169	-0.879729	-0.234923	-1.65031	-1.02553	-0.237634	1.5514	1.16007	1.15479
59	miR-30e-3p	3.23171	1.88512	1.70775	3.35208	2.4406	4.54444	2.78122	0.0248853	1.77513	3.76847	0.558028	1.85333	1.41148	2.85655	2.81637	2.40053	1.87976	-0.30247	4.34417	2.24748	3.75847	1.8637	1.74908	1.0729	1.99164	3.17825	2.87591	1.20147	2.77279	2.81374	1.96479	2.01877	0.589262	4.11252	2.74975	2.70173	2.75265	2.78222	1.84349	1.13101	1.48365	1.54152	1.80959	1.97994	2.37121	1.98248	1.44507	3.83441
59	miR-32	0.871168	-0.572165	0.886308	0.192908	0.549559	0.17225	2.61008	1.47068	2.02318	0.717221	1.16977	0.860062	1.64424	2.68614	-0.256561	0.910645	-1.45803	0.819854	1.46737	2.5032	3.75847	0.357923	-1.95331	1.05322	1.95368	1.67728	0.500024	1.02559	0.161837	1.38125	2.17163	0.985537	0.644773	0.92232	0.578786	-0.668476	0.628991	0.98215	0.779239	2.06739	-0.447008	0.997385	-0.788742	-0.651059	-0.133643	0.933209	0.983898	0.853101
59	miR-320	4.61028	4.53393	5.68594	3.55835	6.6768	5.01056	4.86032	5.28659	5.51609	5.39086	5.14801	5.90046	6.55637	4.89742	4.30132	4.38982	5.78444	5.27831	5.06764	5.53031	3.75847	4.92953	5.52681	5.27279	4.03273	5.93268	6.08999	4.46475	4.48366	5.53874	4.93392	3.97108	4.46475	5.24431	5.7986	4.76543	4.68679	5.85682	5.86122	6.3798	5.44828	6.22808	5.50285	6.3966	5.72126	5.10612	5.3056	5.24706
59	miR-324-3p	4.96428	5.88987	3.09842	4.90328	4.59279	3.787	5.61109	4.36181	3.70009	5.06283	5.69465	3.00384	3.64078	7.26024	4.71211	5.33816	3.72853	4.86237	3.74243	6.26165	3.75847	4.56989	6.30249	5.23759	3.63749	5.32071	6.46584	4.26168	4.71795	4.10733	4.07234	2.68436	3.33182	3.64445	3.90297	4.15861	3.55001	5.01148	6.09039	6.28375	4.93512	4.49284	5.86182	4.66252	4.98748	5.26122	5.0646	3.89217
59	miR-324-5p	2.75989	1.32266	1.75781	1.79028	3.25989	1.48755	2.75935	2.44209	2.34	3.13559	1.67362	2.55057	2.68123	1.20088	1.45509	1.21413	1.38669	1.49507	2.35646	2.03741	3.75847	2.58558	3.46672	3.21953	1.79219	2.50501	2.38559	1.07625	2.48278	2.22013	2.69097	2.6704	1.18248	3.04052	1.53871	1.76142	2.50284	1.98278	2.50171	2.53325	1.48918	3.17605	1.73518	2.35769	1.69564	2.84332	3.50333	1.64741
59	miR-328	3.02527	0.754515	1.89506	1.59893	3.41967	1.68591	3.18921	2.48194	2.53136	2.58286	1.46165	3.18511	3.03868	0.724378	1.54018	1.24733	0.402158	2.00502	3.03283	1.81059	3.75847	3.4773	3.67434	3.07551	3.21938	2.66562	2.96563	0.704265	3.14318	3.34105	3.55888	3.12573	1.04063	3.83059	2.28404	2.00578	2.9891	2.26244	2.36357	1.83639	1.82444	3.28627	1.38833	2.74213	2.36363	2.41265	3.84339	1.99385
59	miR-33a	2.04766	0.474976	-0.136778	1.33362	-0.944619	0.423738	-0.227689	-2.39563	0.718986	0.580624	-2.49541	-0.472265	0.499518	-0.421632	0.946155	1.8113	0.863575	-1.33214	0.584878	-0.193935	3.75847	-0.504325	-0.403839	0.943596	0.244951	-0.132375	-0.285367	-1.68846	-0.570811	0.130764	2.58852	1.47685	0.16038	1.98241	0.968858	-1.67146	0.6194	-0.146372	0.391268	0.494714	0.785663	0.0301993	1.403	0.688445	-0.384126	-0.126464	1.2236	1.1441
59	miR-335	2.53806	1.61624	3.05478	2.28309	1.89629	2.67841	3.05332	1.26195	3.36214	2.8084	1.25785	2.94808	2.25949	2.63784	1.29241	1.98168	1.06295	2.16287	2.93839	1.54669	3.75847	3.07275	1.11441	1.89945	2.63765	2.25687	0.751361	1.39667	2.64904	3.39312	3.29814	2.5528	1.97941	3.09257	2.05618	1.07519	2.83181	1.60216	4.02903	2.17966	2.43787	2.36812	1.04819	2.19824	1.54355	1.78122	1.37149	3.12723
59	miR-340*	2.75489	2.71549	2.25222	1.67072	2.9109	0.919591	2.04225	2.06901	1.84366	2.72624	2.36813	2.44164	2.26732	3.88673	1.66246	2.6533	1.9344	2.57091	2.3308	3.58702	3.75847	1.86879	2.11461	1.91092	3.80874	1.8897	1.35814	-0.404943	1.72312	2.95024	3.34803	2.49854	1.57996	2.52227	2.19959	1.50302	2.9929	0.865087	2.44344	2.23602	2.93489	2.42931	2.7314	3.48505	2.63378	1.6576	3.03373	1.37756
59	miR-346	2.68657	0.130905	1.40359	0.561887	1.80054	0.541346	3.2166	1.52409	1.8728	2.28679	1.33097	2.64932	1.8284	4.303	1.86829	0.484814	0.626348	0.366534	2.57137	1.01503	3.75847	0.905199	1.23826	3.02274	3.66483	1.85052	1.59768	2.01882	1.14191	0.34077	2.65337	2.66596	-0.20894	5.30219	1.92917	2.27605	2.7632	0.00819325	2.72708	-0.779675	1.83817	2.93361	1.11695	1.12595	2.33695	1.91716	2.37924	3.04119
59	miR-375	2.66086	1.136	2.52452	0.743376	0.503741	1.77666	2.01399	1.85564	1.65493	2.20466	1.73728	1.92082	0.985475	2.34213	2.03294	1.71049	1.39807	1.28746	2.22239	2.70888	3.75847	1.80361	1.83054	2.25644	0.673309	1.85159	1.5214	0.506949	1.51063	0.899568	2.53544	1.29982	1.63462	3.01877	2.19865	0.90933	1.3247	1.66369	2.37475	1.63888	1.1112	1.76503	1.59977	1.67327	2.12833	1.67591	1.65616	1.55385
59	miR-93	6.46631	6.15834	5.93826	5.20717	6.53611	5.20544	7.86334	6.7119	5.84349	6.30761	6.00536	7.02019	6.32557	7.30707	5.33587	5.43616	5.18544	6.74456	6.85694	7.05754	3.75847	6.33698	4.66572	6.58162	7.65625	6.87583	6.8621	6.87511	5.17636	5.35445	7.15857	5.17825	4.80637	7.22101	6.16841	6.56242	5.78564	4.91417	6.49464	7.46371	5.75313	6.1087	5.78199	5.07542	6.80971	5.7694	6.438	5.19786
58.0004	miR-181c	0.407792	0.267794	-2.44648	-0.20129	-3.10622	0.110113	3.22219	-1.28761	0.88144	-0.678963	-1.91082	-3.18926	-1.38714	3.4079	-0.530688	-0.532402	1.98398	-1.24505	-3.52019	undetectable	-1.88249	-0.396672	-0.972984	-0.986066	0.809887	-0.678606	-1.50845	2.37964	-3.04382	-0.391176	-2.05919	2.6048	-1.7095	-0.769858	-1.75676	-1.21575	-0.376415	-1.3299	-1.17837	1.07611	-0.559096	0.661235	-1.99062	-1.44875	-1.14727	-1.6534	-1.94672	-1.03888
58.0002	miR-422a	-1.61876	-1.30239	-1.32467	-0.835344	0.160928	-2.2142	0.586843	-1.11401	-1.18887	-1.17701	0.586273	undetectable	-0.137495	2.72821	-2.16086	-0.520411	-1.52889	-1.42284	0.871688	3.46385	3.75847	0.789651	1.19022	0.241029	-0.404744	-1.35095	2.29691	-0.0175327	0.255477	1.1043	-0.66491	-2.3792	-1.19904	-0.0191395	1.51464	0.258429	-0.938295	0.190706	1.4364	-0.363178	-0.649224	-1.84536	-0.816489	-1.3776	0.350004	0.827153	0.388643	-0.312618
57.9999	miR-7	-1.44177	1.63779	0.0345532	-2.17318	0.286695	-2.705	0.649081	4.35235	-1.16956	-0.486975	4.04166	undetectable	-0.154678	-1.16958	-1.01155	-1.55657	-2.9497	4.87973	-0.202316	0.39542	3.75847	1.24872	1.17893	-2.26453	3.67139	0.395941	0.575329	0.735807	-0.559292	-1.2155	2.17049	0.968894	-0.62993	2.65228	0.522532	1.51228	-1.12183	-2.44713	-1.81413	-0.250722	0.0345485	-1.5601	-0.96021	-0.30429	1.23775	1.67544	-0.562785	-2.4605
57.9996	miR-152	2.14774	2.95809	1.85468	0.508815	2.09149	1.98595	-1.14756	-1.51946	1.17781	2.16931	-2.16396	-2.59785	1.57832	-2.99173	1.29985	-0.096763	3.39912	-0.567671	-3.24526	-1.20601	-3.35062	-3.55413	-1.25653	2.98174	0.940056	0.873184	-0.157953	undetectable	1.5729	1.50174	0.659703	-0.588735	0.900644	-0.135075	1.51669	0.230658	-1.13179	1.25527	-3.31395	1.83911	2.49387	1.51729	2.97541	3.71093	-1.5231	1.45425	0.290619	-0.13227
57.9996	miR-423-3p	-0.670319	0.150025	-0.0291543	-0.0012466	1.23096	-1.4651	1.50536	-0.399769	0.481711	0.146655	1.74402	undetectable	0.909272	3.76385	-1.23997	0.113693	-0.514132	-0.603792	1.9272	4.04319	3.75847	1.65315	1.91248	0.882049	0.405313	-0.329282	3.05211	1.57328	1.64519	2.46338	-0.155966	-1.37165	-0.228305	1.44572	2.45886	1.64507	-0.223451	1.31618	2.83378	0.837275	-0.0646716	-0.450578	0.835147	-0.919944	1.24009	1.62219	1.09146	0.660406
57.9994	miR-22	1.33382	2.68424	1.93122	0.966226	2.68038	1.53294	-1.19329	0.2533	1.68968	1.94258	1.0519	-0.935829	0.884669	-3.51016	2.06227	1.59342	3.42821	-0.425277	-1.35293	0.718903	-2.12175	1.92426	0.304124	1.58382	-0.938237	2.06217	0.816247	undetectable	2.07319	2.70153	0.853748	1.26395	1.3252	0.840639	-0.502515	1.52327	1.13635	1.51323	0.738729	0.895469	0.823343	2.47304	3.1478	2.16445	0.144798	2.01786	1.25124	1.50985
57.9992	miR-148a	0.678723	1.97385	-1.36039	-0.450631	-2.95977	-0.253017	3.1706	3.31379	2.16594	-2.70766	2.44095	1.83936	4.03573	5.61518	0.737087	-2.2716	-1.34338	-3.90855	0.699679	3.09703	0.249256	undetectable	-0.30825	3.8464	3.67382	-1.07083	-3.9155	3.79304	1.60478	3.25474	1.9548	3.49446	0.960246	-0.943907	2.61988	3.11727	1.40315	0.946209	-1.85085	6.52848	0.888322	2.286	-1.65944	3.46672	2.47323	3.50138	4.42659	-0.036865
57.9991	miR-196a	3.79682	4.2044	1.14682	3.91801	3.60299	3.24436	-0.873084	-0.754725	2.17662	3.76258	1.43589	1.69344	0.994329	-2.80954	0.904337	-2.23257	3.06093	2.11804	-0.555538	1.04114	0.214922	0.312993	-0.0642711	2.71827	4.57534	-3.93041	2.61037	-0.797454	3.12389	undetectable	1.88099	0.120117	1.89875	2.04194	1.09657	-0.398284	2.54393	3.45884	1.47952	-3.95245	3.59806	1.91848	2.12896	2.80716	0.463171	1.11984	-0.731377	-0.563414
57.9991	miR-28-5p	2.64755	1.74889	2.10155	1.71494	2.08452	2.64921	1.66897	1.61043	2.16211	2.02074	1.06522	1.76099	0.176357	0.144246	1.56501	2.62566	2.96291	0.563602	2.04869	undetectable	-1.21836	2.20349	0.533603	2.66246	-0.0180457	2.05361	2.70265	0.450132	0.800744	0.183208	1.92976	1.62562	0.091052	1.93256	1.71896	1.15861	2.4278	-0.0459488	1.17631	-3.78155	2.40108	1.87932	1.6604	2.68783	1.94841	2.82312	2.49449	1.30565
57.9989	miR-130a	2.54201	-0.128154	2.4799	2.60078	2.65342	2.70479	2.65757	-3.80876	3.67079	3.76687	undetectable	2.31337	-0.346218	-1.31863	3.72924	1.53508	2.77307	-2.11163	-1.1375	0.559287	-3.42532	3.88734	3.32522	2.00233	-1.12581	3.36186	2.26475	1.72415	4.77575	4.49254	3.01143	3.40293	1.61171	5.06051	3.36916	4.34438	3.57229	4.38917	-0.456433	-0.192847	0.512083	4.65197	1.20831	2.80483	2.28897	2.39693	1.28032	1.83622
57.9988	miR-374a	2.71707	1.40545	0.888067	2.02864	1.94462	1.96106	3.337	1.83269	1.72939	2.56668	0.99673	undetectable	1.85857	3.19688	2.23056	2.03427	1.16488	1.97668	2.75653	1.13249	3.75847	1.94253	2.7595	1.51403	1.5288	2.0758	2.5078	0.98545	1.63871	1.81389	2.33179	2.30008	0.527874	3.35894	2.79069	2.32606	1.62469	1.27592	2.7887	2.24452	1.51811	2.08305	2.21311	2.46281	1.84298	1.00206	2.06608	2.06039
57.9988	let-7d	3.27136	2.08423	1.12325	1.22111	3.02781	1.67525	2.48936	1.95421	3.00646	2.7756	2.87181	2.60868	2.83746	3.23383	2.30209	-0.0857455	2.42826	3.22535	-1.02229	undetectable	0.0917704	-1.34225	2.83183	3.01325	3.51715	2.45777	2.7533	1.59992	1.31112	1.8482	2.59228	3.6279	1.98508	2.98866	2.32262	2.04196	2.67399	1.90181	3.55004	3.13983	2.4948	2.78803	1.17297	2.67048	1.94172	1.8837	2.20303	2.18826
57.9988	miR-10a	5.61505	3.95884	3.14963	4.05445	4.09042	4.73765	-1.18996	2.43398	3.53733	3.8003	3.44522	3.55083	5.2087	undetectable	3.32796	0.54614	-0.444363	4.98616	5.94131	2.95182	0.511439	2.44129	0.682688	2.28909	0.701114	1.7127	1.7736	-1.15166	-0.123747	0.460342	-0.518084	0.438024	1.51923	-1.71492	0.129781	1.95344	4.66913	-0.263377	-0.246518	-2.40032	2.93915	3.35368	2.90984	3.79291	1.25735	2.74638	1.2913	6.69072
57.9986	miR-151-3p	3.39301	2.97394	3.00367	2.17433	2.94593	3.25054	-3.00544	2.51185	2.74224	2.33626	2.36832	3.80684	2.6345	-3.87675	2.74306	2.36116	3.73291	4.12013	2.80073	2.68668	0.754931	3.72161	0.450175	2.65797	3.02366	2.55846	2.75136	-2.3506	3.97824	2.55578	4.22991	3.86848	1.50455	2.7579	1.92797	3.14483	3.39878	2.31874	3.1369	-2.81349	3.05924	3.41683	2.06887	2.50397	2.69227	2.39242	3.47991	3.42212
57.9982	miR-424	3.44197	2.98346	3.13272	3.11334	2.67734	2.5666	3.37914	3.18307	3.35498	4.17463	2.80632	undetectable	3.75006	3.9817	2.75814	2.94606	2.63854	3.06906	3.3311	4.02769	3.75847	3.21252	3.2989	3.49131	2.98555	2.74979	3.08055	2.94318	2.82932	2.49238	3.3975	3.61592	2.42118	2.80396	3.65571	2.38396	2.83292	2.62543	2.92725	3.63899	2.31926	3.48913	3.94126	2.96303	2.99089	3.11402	3.85709	3.01875
57.9979	let-7i	4.00347	4.72421	4.41613	4.31157	4.68815	4.73502	3.03456	1.92814	4.15217	5.19581	2.72139	3.20339	2.48529	3.56308	4.08984	2.40323	4.73104	4.12723	-0.0753742	undetectable	-0.393994	2.71796	3.84855	5.26074	4.0298	3.47983	4.21736	2.17838	2.97767	4.86662	3.50056	4.91052	5.44002	3.57095	3.73663	2.81729	5.6774	2.74212	4.76863	4.03572	3.59915	3.5268	3.81528	4.65178	3.60911	4.70141	4.57964	4.37764
57.9971	miR-221	6.38456	3.56277	4.15007	4.44867	5.27898	5.41964	3.82256	5.36287	3.47741	4.77381	2.73417	7.1744	5.09385	5.69162	6.77418	7.06701	5.42949	6.66925	6.29812	1.86803	1.35562	6.7946	6.01833	2.50643	0.699493	8.6114	5.69727	2.15599	7.04838	6.25031	3.68027	5.75824	2.30915	7.99183	6.18232	6.40248	6.19022	4.49936	6.04758	1.19701	4.71213	7.97561	6.4833	3.78853	5.73311	3.56674	3.7122	5.68935
57.9954	miR-92a	6.77929	7.37309	7.32938	7.70781	7.72345	7.09052	9.55803	9.5307	7.02837	7.2595	9.00666	undetectable	7.38357	10.6336	7.71042	7.88172	7.565	7.85843	7.44619	11.9646	3.75847	8.9427	7.77297	7.65815	7.51248	7.77224	8.2595	8.95382	8.62307	7.15114	7.39827	7.86457	8.42746	8.024	7.24541	6.84935	8.36592	9.1494	9.35706	10.8373	7.3934	6.77207	7.0947	7.08226	7.75012	7.28291	8.84552	7.71656
57.0003	let-7e	1.39573	0.160839	0.272443	-0.51062	0.205057	0.674482	-4.10195	-3.72001	0.123099	1.67665	-1.63183	-0.940024	0.542521	-1.67584	0.792172	0.412474	0.973676	-0.134311	-2.20652	-1.92314	-3.54179	-3.99531	-0.991623	-0.940904	0.658966	0.273878	-1.40745	undetectable	-1.22016	1.38605	0.659198	0.670531	-1.11885	-0.337718	-0.522049	0.404655	0.44423	-0.29332	0.943726	-4.26758	0.210624	-0.879977	-0.0845161	-0.177316	-1.64186	-0.594564	-2.25896	0.82255
57	miR-193a-3p	1.93501	1.97756	-0.0716541	-1.35814	1.75504	1.33406	-3.29848	undetectable	1.13314	0.258309	1.66826	-1.84614	-0.920154	-1.54509	1.82285	1.70978	0.859353	-2.20198	0.154702	-2.53353	-3.66806	2.12146	1.09596	0.996022	1.09732	-0.962762	0.0462077	-1.54242	1.28645	2.48033	0.458406	2.15941	-0.318948	-0.62963	-1.34271	0.485937	-1.22989	1.48847	0.0857965	1.17672	1.61504	1.3931	0.0840146	2.08005	-0.435046	0.409305	-1.38041	-0.0542835
56.9999	miR-135a	-0.462238	0.445001	-3.21554	0.356726	1.051	-0.544473	-1.19137	4.04085	-0.119949	-2.63152	1.68925	-0.180786	-0.974849	-1.94298	-0.940581	0.801089	-2.36737	0.0793002	1.03939	0.0712204	-4.2021	-2.66724	-1.65041	0.381527	1.30196	0.680629	-0.322833	-2.34677	2.62087	0.484865	-3.61834	1.69071	0.00766904	-1.54381	2.43047	0.46748	0.72724	2.79431	-1.05267	undetectable	-1.17061	-3.60151	-2.28594	-3.28929	1.53321	-0.208675	1.44913	3.23998
56.9996	miR-126	0.224814	2.23362	2.38471	1.25072	-0.982144	2.00535	3.95483	-1.88135	2.68849	0.783131	0.386861	2.70407	-3.09508	0.825733	0.958621	-0.50959	0.992337	-1.7137	2.19059	6.83983	-5.21624	3.00058	-0.976956	2.02785	2.11299	1.95538	-3.74276	undetectable	2.62673	2.45418	2.50449	1.88522	1.62797	2.13565	0.918786	-2.2736	1.10671	1.61689	-3.85317	3.16868	0.38745	0.672548	0.18114	-1.27948	-0.225917	-0.277963	1.88322	1.69422
56.9992	miR-196b	5.28788	5.32942	0.923589	5.46931	2.48429	3.22855	0.852168	1.56176	2.66994	1.54549	0.103782	3.72256	1.74179	-2.35651	0.902159	0.394866	2.7909	3.13901	-2.14769	-1.90914	1.13492	0.858031	0.486621	0.92768	2.71079	-2.96026	0.116689	undetectable	1.57179	-0.697578	-0.334941	2.0353	3.3691	-0.885456	3.70649	0.719506	1.13464	3.12132	3.43286	-0.938993	3.81551	0.70835	-0.134636	2.55706	-0.881814	-0.441013	undetectable	0.64072
56.999	miR-99b	3.28258	2.3209	3.10133	0.966167	2.67601	2.68471	-1.83435	-2.53269	1.71815	3.6167	0.554808	2.86957	2.46652	-0.607774	2.35952	2.43434	2.54865	2.4166	2.03984	1.69983	3.75847	-1.7031	-1.20748	1.43181	3.02243	2.69568	1.16014	undetectable	1.92878	3.83098	4.11516	2.24943	1.01858	2.51912	2.59457	3.35923	2.66787	0.668125	2.28748	-3.75957	2.6611	1.65844	1.92267	2.69273	1.56449	1.30042	0.608289	3.20993
56.9975	miR-99a	5.61097	5.38047	5.27508	-1.84612	6.97147	6.42088	-3.25041	0.196228	4.66813	5.22117	-2.99711	6.79702	-1.13405	2.1898	7.12176	8.20809	6.93065	-1.43597	-0.0866769	-2.71789	3.75847	9.21951	1.87663	1.46973	3.57908	7.83023	5.6813	undetectable	6.15307	4.69692	3.19546	1.27558	4.34646	7.1638	7.26449	4.52871	2.07472	3.16205	8.44442	4.91291	4.01278	7.39053	8.46728	6.42879	6.50452	5.12686	4.81761	6.96979
56.9974	miR-100	5.92201	5.54429	5.42319	-1.4686	6.80894	6.73382	-3.09775	0.226383	4.93838	5.38758	-2.49182	7.07537	-0.648134	2.45242	7.38701	8.51795	7.20699	-0.897032	0.356327	-2.07104	0.300407	9.39889	1.93983	1.78735	3.63817	8.04943	5.92961	undetectable	6.62178	5.10745	3.41533	1.4631	4.70092	7.26391	7.4269	4.52628	2.20663	2.9144	8.68506	4.98307	4.33691	7.60065	8.72237	6.67158	6.69433	5.3591	5.04635	7.26604
56.001	miR-206	-1.78195	-1.24834	-3.53227	1.47018	undetectable	-0.275034	-2.41217	-1.45053	-1.64224	-3.58461	-1.93067	undetectable	-1.13563	-1.55963	-2.242	-3.67621	-2.41508	-0.752121	-3.2938	-1.54205	-1.93434	-1.79669	-0.542177	-2.35987	-2.94905	-2.25193	-1.78853	-0.61371	-2.86249	-2.77082	-3.6179	-2.04507	-1.59467	-1.5124	-2.26543	-1.08392	-0.765428	-2.7804	-0.543992	-0.102854	-0.670488	-1.8104	-3.98654	-2.54986	-3.72451	-1.31464	-2.56271	-1.80021
56.0002	miR-429	0.612141	-1.09662	-2.36341	1.50448	-0.101693	0.487816	1.27812	0.13486	0.248745	0.626044	-2.99007	undetectable	1.266	1.04147	-0.749245	-0.610387	-2.08876	-0.669905	-0.825937	-0.136479	3.75847	-1.00345	-2.19129	-2.71605	0.151958	-1.04223	-1.92505	undetectable	-1.5807	-1.29688	0.555856	0.823956	undetectable	2.63943	0.651654	0.496469	-0.45883	0.70747	0.905792	2.48919	-1.53919	-0.500286	-1.30877	-0.348938	-1.17396	-2.97503	-1.25888	-2.15799
55.999	miR-9	3.41907	-0.678432	1.60017	-2.54741	-0.638935	0.00629549	4.21004	-2.5177	2.35112	3.20739	4.33677	3.38183	-2.49881	-0.181114	1.6069	-0.090872	-3.05508	undetectable	1.66425	3.10771	3.75847	1.0061	1.81413	-1.12193	1.26445	-0.700175	4.26713	1.07202	3.67713	undetectable	3.85294	5.61576	2.05027	4.21071	-0.178225	-2.88327	-0.432645	2.49587	6.10899	1.63003	-3.26644	4.58077	8.23967	1.54331	4.55821	3.98009	3.14434	-0.714176
55.9989	miR-30a-3p	3.86659	3.23865	3.28481	4.95584	3.29456	5.05534	-1.05783	-2.541	1.44497	3.20131	undetectable	-1.80324	-1.52542	-1.94082	3.74558	3.71019	2.35607	-1.77059	5.96667	-2.11107	-2.62409	2.42732	-2.00658	1.32411	2.28802	4.57264	2.66302	undetectable	4.09069	3.31266	3.24408	2.25996	1.12426	4.88123	3.06316	3.76657	3.50909	3.19847	-0.774073	-2.90848	2.41894	2.73065	1.52919	2.00004	2.12763	1.09371	1.27928	5.56589
55.9972	miR-125b	5.70344	6.38511	5.55742	3.4254	7.41203	7.03434	-3.00178	1.14685	4.97968	5.3995	undetectable	7.10056	-0.897853	2.87793	7.58394	8.47881	8.89185	-2.05688	1.64436	-2.28539	0.517059	8.83227	2.28714	2.84025	3.90237	7.72783	6.10089	undetectable	5.84726	7.00879	3.95258	2.38004	5.45577	8.04762	7.75651	4.47526	2.19862	3.89704	8.5296	5.47701	4.00966	8.35288	8.94637	7.27651	6.51732	5.52368	5.74115	7.3458
55.0008	miR-212	-3.16201	-0.00509257	-0.945601	5.11237	-1.70342	1.74537	-1.82874	undetectable	-2.70652	-1.57272	-1.88436	-3.34195	-0.554505	-2.33932	-0.680629	-2.75212	-1.87799	3.06766	-3.37574	-1.25092	-2.04577	-1.48349	2.25103	-2.53813	-3.10601	-2.18612	-2.91417	undetectable	-3.68067	-4.11051	-0.12471	-0.0232278	-1.35002	-1.55711	-4.5422	2.85488	-2.57282	0.229004	-2.72074	0.987781	-2.61446	-4.14535	-1.38275	-2.73537	-2.37507	-2.38815	-2.33679	-2.99021
54.9998	miR-149	0.758182	0.00967193	0.63294	0.0478034	1.0857	-1.09558	-3.70759	-2.35879	0.0162245	1.07679	-1.91157	1.91321	0.419152	undetectable	1.34797	1.33601	0.348508	1.06643	1.15066	undetectable	-5.028	-1.24322	-1.85483	-2.88981	0.576676	0.747247	-0.30339	undetectable	undetectable	1.72363	1.36943	2.9896	0.716053	3.83927	0.689311	1.99373	2.56909	0.201469	0.908153	-1.94972	0.921461	2.36319	0.266126	1.40182	-0.499491	-2.58523	-0.579825	1.69533
54.9992	miR-10b	3.80198	3.55471	1.18355	3.09306	0.677906	3.72414	-1.56026	0.609964	0.838308	2.0903	1.74368	0.752084	3.25067	undetectable	1.35652	-1.13517	-1.95828	1.5759	5.78036	0.279726	2.53429	-0.603387	-0.949254	2.98068	-2.19057	-0.692992	2.37217	undetectable	1.09682	-1.18492	1.18646	-3.18507	-0.707783	1.7667	3.36547	-1.90477	1.72518	-0.555185	1.29651	undetectable	2.0916	2.77021	2.74622	3.55933	1.27772	3.06152	2.20264	5.35447
54.999	miR-345	3.02561	0.559763	1.49863	2.30192	2.39244	1.69575	5.95439	-3.74947	2.63698	2.70651	undetectable	1.89172	undetectable	3.328	1.40753	-2.3018	1.58721	undetectable	2.11448	2.23167	3.75847	2.60057	-0.672024	2.19592	4.06333	1.40486	1.75163	4.48238	3.02116	0.0246835	2.60599	2.07626	0.0506135	4.55426	2.0152	1.78968	-3.01107	1.80669	3.34889	-3.94407	2.3802	3.48362	1.32157	2.59805	0.941671	-0.154511	2.73964	3.13988
54.0008	miR-181a*	-1.14596	-2.81385	-3.26118	-0.884704	undetectable	0.426901	3.04989	-2.34659	-2.08507	-0.561543	undetectable	-1.76841	-3.40852	2.47475	-0.360029	-0.274747	-0.127532	-1.99217	undetectable	undetectable	-2.41294	0.129148	-0.807292	-2.51639	-0.665289	-0.549856	-0.987568	1.25551	-1.86759	-2.49366	-2.20468	0.313784	undetectable	-4.16688	-2.79829	-4.12306	-0.660388	-2.36017	-2.62724	-4.10284	-2.65561	-1.63471	-0.220381	-1.54163	-0.0599159	-3.19408	-2.58018	-1.91501
54.0004	miR-425*	1.88409	1.5391	-0.491701	-2.89267	2.92745	-0.688069	-0.594229	-3.88694	-0.659286	0.0753506	undetectable	undetectable	-3.03259	-0.416482	-1.04647	-1.22483	undetectable	undetectable	-0.771877	-1.43311	3.75847	-2.1522	-2.48282	-1.47191	-0.475475	-0.389554	-1.83898	-2.38591	2.4749	-1.26489	-0.789192	-0.625903	-2.40776	-3.26029	-2.26596	-1.31685	-0.564091	2.42271	-1.21928	-1.75359	0.445904	3.01326	-1.02438	-0.149771	-1.03544	-2.24162	-3.43737	-2.02074
54.0002	miR-361-5p	-2.19346	1.39053	0.445148	2.38655	-1.82699	1.65639	-3.01216	-0.161215	0.350649	-0.0313131	undetectable	0.0707921	-0.101577	-3.88991	-0.701954	1.3643	-3.87425	0.34003	1.35818	undetectable	3.75847	0.832591	-2.78176	2.38023	0.613869	-1.96796	undetectable	undetectable	-2.52656	2.99552	1.76403	1.52515	0.879509	-4.08869	-0.195463	-0.283192	-2.3516	-1.75011	-3.02825	0.210995	0.115823	-1.79791	-4.20471	undetectable	-2.97881	2.01575	1.87706	-3.63347
54	miR-98	1.2315	-1.79363	-0.756036	-1.70785	0.0674196	0.842786	0.401601	0.303988	0.337035	0.736719	-2.17805	0.548836	-1.34981	0.215841	0.353102	-1.1513	0.0569849	0.72783	-4.36564	undetectable	3.75847	undetectable	-2.19501	0.255656	1.02193	0.508274	1.07982	undetectable	0.844895	0.022169	1.49498	0.281906	undetectable	2.86715	0.825438	-0.402857	0.528466	-1.26941	1.15204	0.137618	0.473757	-0.627403	-0.174943	0.251554	1.08327	-2.13616	0.775292	-0.126993
54	miR-296-5p	2.00377	2.24434	undetectable	undetectable	undetectable	2.29778	-3.23434	1.55407	1.14273	-1.24066	0.811252	-2.78629	-2.98047	-3.79851	0.445957	-1.81443	2.31125	undetectable	-2.7504	0.77524	-2.411	-2.30796	-0.0465621	1.69445	3.10241	-3.21044	2.61416	-1.09721	-3.12874	0.732746	3.4342	undetectable	1.95073	-0.847246	-4.37991	3.1677	-1.10274	-4.15211	-3.16562	1.5047	2.5172	2.10135	-0.158466	0.823635	2.99305	2.51435	1.03614	-4.00173
51.9992	miR-200b	4.23843	3.01838	0.131382	4.30585	-1.91224	2.74098	-0.170941	7.33911	3.91045	-0.214092	6.1418	4.81081	5.38061	-3.63211	0.516308	1.6781	-3.58793	6.62865	3.12152	undetectable	4.78919	2.80435	2.10887	undetectable	4.56422	-0.752591	-3.24126	1.71434	1.30314	0.825097	-3.18755	5.18972	-2.74194	-4.11196	5.85734	4.0059	4.30349	1.45737	2.47175	0.55358	5.05208	undetectable	undetectable	undetectable	undetectable	0.315546	-3.56168	1.56029
51.0014	miR-34a	-3.6286	-2.34423	-3.59805	-0.799272	-3.41182	-1.79168	-3.93404	undetectable	-4.03977	-2.13618	-3.51753	-2.23643	-3.92622	-2.66061	-4.2736	undetectable	-4.20916	-3.15905	-1.47728	-2.87959	3.75847	-3.79005	undetectable	-1.85052	-3.40278	undetectable	-1.58257	undetectable	undetectable	-2.9677	-2.27164	-3.52358	-2.48134	-3.93843	-3.50993	-2.83563	-3.54411	-1.58594	-2.61991	-1.40497	undetectable	-2.8688	-3.25864	-3.84092	-2.6936	-3.61811	-0.528808	-2.14435
51.0007	miR-183	0.291689	-1.01352	-1.54633	-1.86235	-2.42939	-2.45819	undetectable	-2.57923	-0.389223	-0.446907	-3.27975	0.223602	-1.6125	undetectable	-2.71309	-1.61553	-2.68601	-2.01921	0.0306801	0.2599	-4.18623	-1.31195	undetectable	undetectable	0.539413	-1.57554	-2.05878	undetectable	-0.585984	-0.974813	0.350668	-2.08587	undetectable	1.9606	-0.382297	-1.29098	-1.16898	-1.36237	1.17249	-0.911669	-1.65969	-2.45923	-2.90357	-4.28992	undetectable	-2.66214	-2.37454	-1.82987
50.0016	miR-124	-3.58338	-2.62785	-3.31629	undetectable	-3.03905	-3.95677	-1.49991	-3.95524	-3.87279	-3.91291	-2.25855	-2.77296	-3.59675	0.8695	-4.05138	undetectable	-4.04012	undetectable	-3.8672	-0.332491	-5.52378	undetectable	undetectable	-3.15962	-3.36672	-4.08145	-2.10574	-2.54575	-4.0205	-3.71302	-3.12072	-4.44757	-0.0230672	-3.4247	-4.41642	-3.40639	-4.11281	undetectable	-4.42572	0.720028	-3.46832	-3.09986	-3.77793	-3.96074	-3.77716	undetectable	-2.63105	-4.34902
50.0009	miR-342-3p	-1.92236	-3.64831	-2.52079	-3.07068	-1.59805	-2.64513	undetectable	-2.86693	-2.63882	-1.6956	undetectable	-1.28594	-3.72808	-1.40748	-2.86289	undetectable	-3.22293	-3.04813	-1.52905	-1.89771	3.75847	-1.80981	-0.162298	-2.24653	-1.30473	-2.07905	-0.242891	undetectable	-0.77087	undetectable	-1.18817	-2.3374	undetectable	0.436519	-1.39455	-1.7123	-1.52353	-1.45548	-2.97876	undetectable	-2.32227	-1.57262	undetectable	-2.40747	-0.819139	-1.63054	-0.787872	-2.39879
49.999	miR-146a	1.40299	1.46633	-2.80645	-2.9273	3.21605	5.63212	3.19064	3.5257	-2.93275	undetectable	-3.02341	undetectable	undetectable	3.3703	0.931044	6.4164	3.53964	-2.94046	0.241624	-1.55217	-0.994284	7.82437	5.96659	8.00814	undetectable	5.32733	8.35118	undetectable	1.11969	undetectable	2.65437	-0.172918	-3.03374	-4.61973	-1.27118	undetectable	1.33534	-0.333878	-3.23911	4.20386	4.01194	-0.276404	5.63783	-1.68867	7.54175	8.19277	8.95826	-0.766834
49.9982	miR-31	5.62099	5.23731	6.95994	undetectable	4.75615	4.75544	undetectable	4.47825	6.4947	3.73642	1.26249	7.90635	3.67134	undetectable	6.05745	5.42174	4.98312	6.9113	-2.18392	undetectable	3.75847	7.28066	0.991627	undetectable	-3.05646	undetectable	-0.422714	-1.31329	4.7221	1.70345	3.33321	-2.86355	4.7147	6.52865	7.50458	3.21689	4.32876	3.5059	6.33134	1.65014	3.85455	0.0830368	6.42946	4.98993	1.40735	2.94923	undetectable	6.76209
48.001	miR-96	-1.75296	-1.49141	-2.03048	-2.51193	-2.81546	-3.60507	undetectable	-3.43858	-1.57352	-2.21852	-2.11882	-0.445288	-1.44432	undetectable	-3.08431	-1.90126	-2.83097	-2.76566	-1.4474	-0.649117	3.75847	-3.85571	undetectable	undetectable	-0.473597	-2.65825	-2.72195	undetectable	-2.36517	-1.93799	-1.23619	-2.47329	undetectable	-0.120055	-1.7002	-1.18638	-3.0344	-2.74713	-1.33431	-1.48944	-3.82745	-3.80994	-3.22913	undetectable	undetectable	-3.88007	-3.50769	-2.13493
47.0012	miR-133b	-3.99571	-0.155687	-2.50729	0.148098	-3.40127	0.1203	-2.53323	undetectable	-3.74726	-3.76208	undetectable	-2.36253	-2.6117	-3.91932	-3.69532	-3.27329	-3.27981	-2.62545	-4.32711	-3.26699	-3.06259	undetectable	undetectable	0.668881	undetectable	-3.24293	-2.32292	undetectable	undetectable	undetectable	-2.29539	-4.61046	-2.76864	-2.66094	-4.45134	0.418276	-3.96943	-2.89739	-3.27869	-1.11433	-1.10043	-3.47909	-2.61381	-3.52189	-3.80233	-2.93901	-3.34562	undetectable
46.0004	miR-218	-4.48474	-1.39031	-0.684449	-0.354212	1.7974	-1.28528	undetectable	-3.47052	-4.47744	0.146944	undetectable	-2.36113	undetectable	undetectable	1.6462	-0.0806385	-1.33016	undetectable	-4.31216	0.724694	undetectable	-1.00082	undetectable	-0.379849	-1.61176	-1.50175	-1.58544	undetectable	-1.34765	0.740154	-1.83321	0.490918	-1.7089	-0.52705	2.3119	0.929454	undetectable	-2.501	1.55714	undetectable	-2.20905	0.961061	1.16774	-1.704	-0.678466	-0.97717	-2.37189	1.63878
45	miR-339-5p	undetectable	undetectable	0.182592	undetectable	0.0450791	-2.22641	undetectable	0.798831	1.48529	0.213704	0.934734	0.0496141	-0.227685	2.02062	1.03822	1.13738	0.472786	0.223831	-2.40858	undetectable	3.75847	-3.9084	undetectable	-2.14459	1.50792	0.229584	undetectable	-2.34559	1.79803	3.57951	-0.499706	undetectable	-0.029578	-2.86743	3.6772	-0.101159	0.00772888	1.92548	0.948546	1.33084	-2.93501	3.59364	-2.0935	undetectable	undetectable	-0.748567	undetectable	-2.69599
44.9992	miR-200a	3.84688	1.65116	-1.06215	3.07635	-2.43617	2.58615	-1.35221	6.60454	3.68508	-0.890882	6.56234	4.04558	5.43718	undetectable	-0.12909	0.486528	undetectable	6.51569	2.64173	undetectable	3.20475	1.61566	0.983332	undetectable	4.36188	-2.19405	undetectable	1.2948	0.272908	0.199572	-4.20791	4.93505	undetectable	undetectable	5.53225	3.49918	3.778	0.444696	1.92024	1.4084	4.58227	undetectable	undetectable	undetectable	undetectable	-0.271198	undetectable	0.561741
42.0002	miR-203	undetectable	1.77566	undetectable	-3.41811	undetectable	-3.16316	-1.82253	3.63469	-2.03599	-1.92332	5.06624	2.63118	5.10312	undetectable	-3.4098	undetectable	undetectable	1.92807	-0.620039	undetectable	-1.34791	undetectable	-2.59974	undetectable	5.18042	undetectable	undetectable	0.0117533	2.25263	-1.29835	-0.414969	1.66754	-0.968376	-4.43433	1.63474	1.99233	-2.64462	1.6474	-4.45721	1.59424	-0.314732	-5.02382	undetectable	undetectable	-3.96538	-3.46237	undetectable	-1.2046
41.0003	miR-378*	undetectable	-2.76394	-1.34669	-2.44794	undetectable	-3.0452	undetectable	1.40587	0.0991255	0.0471659	1.92416	undetectable	4.05919	undetectable	undetectable	-4.26607	undetectable	1.88681	0.121438	-2.77527	3.75847	undetectable	-2.00986	-2.28753	6.37266	-3.04449	undetectable	-2.48989	undetectable	undetectable	-0.535944	-1.26459	4.63182	-0.823153	-3.37883	-2.50391	-1.4877	-2.63471	2.12173	-2.57679	-0.740117	undetectable	undetectable	-4.47673	-3.89551	undetectable	-1.68093	-3.22967
40.9997	miR-155	5.47723	2.92895	-3.82665	2.55633	0.342748	0.955715	3.71902	undetectable	-0.0231282	undetectable	-2.86422	undetectable	-1.84047	-0.807055	-0.755261	2.09347	1.40964	undetectable	undetectable	undetectable	-1.50346	5.11334	1.93989	0.543104	-4.47452	undetectable	0.366982	1.62413	3.1832	undetectable	-2.82639	undetectable	0.713281	undetectable	-1.19482	-3.34749	2.51271	2.76106	-2.14223	-1.1208	5.45273	3.1899	2.04467	1.08355	undetectable	undetectable	undetectable	0.652268
39.9995	miR-142-3p	undetectable	3.14805	-1.14756	undetectable	undetectable	undetectable	9.79398	7.71841	-3.18374	-3.24194	1.50608	0.112401	1.64677	10.3237	-3.30259	4.69403	-3.14207	0.247972	-2.27163	8.86082	-4.61688	4.30532	undetectable	4.39567	-1.35314	-1.35409	-3.40426	9.06391	2.50795	undetectable	undetectable	-3.67722	undetectable	undetectable	undetectable	undetectable	-4.33415	3.02921	undetectable	8.03698	undetectable	-3.96817	-3.66956	undetectable	1.07588	undetectable	undetectable	-1.60566
38.0011	miR-331-3p	-3.49458	-3.89816	undetectable	undetectable	undetectable	undetectable	-2.83233	undetectable	-4.38229	-3.89108	undetectable	-1.8065	-3.1828	undetectable	-2.45611	undetectable	-3.78586	-3.22208	-2.54326	-3.16643	3.75847	-2.45077	undetectable	-3.54754	-3.86987	-3.54528	undetectable	undetectable	-4.14466	undetectable	-2.84586	-3.4561	undetectable	-2.08497	-3.91493	-3.6416	-2.90947	undetectable	-2.9937	-1.87041	-2.93049	-4.32392	undetectable	-3.47085	undetectable	-2.96642	-3.3184	undetectable
38.0008	miR-199a-5p	undetectable	undetectable	undetectable	-2.09558	undetectable	-2.98388	-3.3746	-2.67239	-4.16398	undetectable	undetectable	undetectable	-2.52346	-1.70317	undetectable	undetectable	5.36731	-3.09568	-0.342532	-1.76521	-4.3223	0.281931	-2.75668	-3.29504	undetectable	undetectable	undetectable	-1.36369	undetectable	-3.63139	undetectable	-3.07918	-2.5816	-4.16339	-0.439211	-3.58159	-2.87833	undetectable	-2.21697	-3.40451	-2.31669	-3.73894	undetectable	6.56677	-2.76205	-1.22452	undetectable	-3.69894
37	miR-137	0.707407	undetectable	1.44443	-2.22612	4.14897	3.01335	-3.19671	undetectable	-1.65696	2.05194	undetectable	undetectable	undetectable	undetectable	1.48307	-1.25913	3.39415	undetectable	-3.72787	undetectable	-6.31537	3.15603	undetectable	undetectable	-3.06945	-0.833325	-0.137042	undetectable	-1.50213	undetectable	-0.769117	2.27362	undetectable	6.05953	-1.74357	undetectable	undetectable	-2.78592	undetectable	undetectable	-2.5739	3.85178	-0.33317	2.09106	-2.97503	-3.58352	undetectable	3.03706
35.9997	miR-224	undetectable	undetectable	3.87063	undetectable	2.36684	2.14583	undetectable	2.72508	undetectable	2.19029	0.852618	-1.08598	-0.957727	-3.73036	3.49175	2.49812	0.8475	4.00077	undetectable	3.42208	undetectable	undetectable	-1.35524	undetectable	undetectable	1.41996	undetectable	undetectable	undetectable	1.52177	-0.33077	2.72338	2.97811	undetectable	0.386196	0.179446	2.58268	undetectable	-3.692	undetectable	1.48461	1.24153	1.86727	undetectable	undetectable	undetectable	undetectable	1.59278
34.9998	miR-141	undetectable	-3.6347	-2.68315	undetectable	-3.23081	undetectable	-3.54461	4.26028	4.16156	-0.616042	5.59803	4.70583	5.90978	-3.29121	0.184189	undetectable	undetectable	4.56404	1.17148	undetectable	2.8223	undetectable	-0.473023	undetectable	5.01874	undetectable	undetectable	1.27063	-3.81486	undetectable	-4.04118	5.17416	-0.483833	undetectable	4.86564	3.40645	0.993938	-3.34302	-3.96428	-3.47622	-2.58834	undetectable	undetectable	undetectable	undetectable	-0.27852	undetectable	undetectable
34.0005	miR-95	undetectable	-3.65865	-2.01458	undetectable	-3.04229	undetectable	-3.76013	undetectable	-1.23921	1.55024	-0.449288	0.261425	-0.388088	undetectable	undetectable	-0.435313	undetectable	undetectable	-2.28728	undetectable	3.75847	undetectable	undetectable	-4.1554	-0.711826	-2.35429	undetectable	undetectable	-1.78439	0.192997	-0.368632	-0.161876	-2.22907	-1.2135	-2.49502	-2.60873	-2.54457	-0.841004	undetectable	-4.35215	-0.341242	undetectable	undetectable	undetectable	undetectable	undetectable	-2.4842	-0.798427
33.0009	miR-330-3p	undetectable	undetectable	undetectable	undetectable	-3.74844	undetectable	-2.80246	-2.32108	-3.81082	-3.61546	-2.7819	-3.47167	-1.94217	-2.71273	undetectable	undetectable	-3.97068	undetectable	-1.97706	undetectable	3.75847	undetectable	undetectable	undetectable	-2.93968	-3.61349	-4.05033	undetectable	-4.04344	undetectable	-3.21285	undetectable	-2.17233	-3.33461	undetectable	undetectable	-3.35428	-3.11033	-3.37532	-0.0945338	undetectable	-3.29264	undetectable	-3.83014	-1.1945	-2.7137	undetectable	-3.99971
33.0009	miR-378	undetectable	-3.52813	undetectable	undetectable	-3.86871	undetectable	-2.32988	undetectable	undetectable	undetectable	-3.72782	undetectable	-2.53882	-0.225265	undetectable	undetectable	-4.03307	undetectable	-1.09944	-0.638157	3.75847	-3.06164	-1.62608	-2.89775	-2.60342	undetectable	-1.42348	undetectable	-4.24456	-3.25631	undetectable	undetectable	undetectable	-3.51504	-2.22273	-2.01981	-3.73765	-2.15928	-1.70292	-3.30045	undetectable	-4.90409	undetectable	undetectable	-3.0761	-2.89757	undetectable	undetectable
33.0008	miR-105.h	-3.40062	-4.16993	-3.87323	-2.51276	undetectable	-2.98209	undetectable	undetectable	undetectable	-2.23047	undetectable	undetectable	-3.88098	undetectable	undetectable	-2.33338	-4.06846	-3.90697	undetectable	-1.56344	-5.04902	-2.25169	undetectable	undetectable	undetectable	undetectable	-1.03218	undetectable	undetectable	undetectable	-2.76486	-3.72117	undetectable	-3.66037	undetectable	-2.43586	undetectable	undetectable	-2.45685	-3.23206	undetectable	-1.76779	-2.80284	-2.26677	-0.750459	-0.967048	-1.36963	undetectable
32.001	miR-190	-2.35234	undetectable	undetectable	-4.12965	-4.05622	-3.74931	undetectable	undetectable	undetectable	-3.12173	-0.86514	undetectable	-3.7185	undetectable	undetectable	-4.10363	-3.29824	undetectable	1.87552	undetectable	-4.35129	undetectable	undetectable	-2.56177	-3.9396	-3.93481	undetectable	undetectable	undetectable	undetectable	undetectable	-3.03607	undetectable	-4.40866	-2.92638	-3.92325	-2.55895	-4.05457	-3.39102	-1.35251	-1.93594	-1.42647	undetectable	-3.48146	-3.79048	undetectable	undetectable	undetectable
32.0004	miR-204	-3.77315	undetectable	undetectable	-0.675986	undetectable	-1.84553	undetectable	undetectable	undetectable	undetectable	undetectable	undetectable	-2.25753	undetectable	-1.85328	-3.69654	-0.217458	undetectable	-2.74404	undetectable	-4.97007	undetectable	1.15444	-0.244313	undetectable	-1.79425	1.60232	undetectable	undetectable	-3.70999	-3.12988	-4.13711	0.174709	-3.58434	undetectable	undetectable	undetectable	-4.07549	undetectable	-1.84975	-2.99754	-2.78577	undetectable	undetectable	1.93108	3.41654	3.68337	undetectable
31.0005	miR-145	undetectable	undetectable	-3.31137	undetectable	-3.30975	-4.45031	-3.77628	undetectable	undetectable	-0.457386	undetectable	0.408847	undetectable	-2.05166	-3.42267	-3.41643	5.53392	undetectable	-1.08051	0.0809054	undetectable	undetectable	undetectable	undetectable	undetectable	undetectable	undetectable	undetectable	undetectable	undetectable	undetectable	undetectable	undetectable	-4.59021	-2.38038	3.14674	undetectable	undetectable	undetectable	-2.99295	0.479337	-2.4497	-3.94483	4.20599	-0.867364	-3.53334	-3.65943	undetectable
29.0009	hsa-miR-139	-3.71612	-1.71945	undetectable	-3.7231	undetectable	-3.11074	undetectable	undetectable	-3.80907	undetectable	undetectable	-2.47401	-3.76772	undetectable	undetectable	-2.99244	-3.24315	undetectable	-2.39796	undetectable	undetectable	-2.74797	undetectable	-4.28651	-3.6476	-3.40199	-2.44475	undetectable	undetectable	-3.81609	-4.25259	undetectable	undetectable	undetectable	undetectable	undetectable	-3.34892	-3.17975	-3.72486	-1.63069	undetectable	-3.97637	undetectable	undetectable	-3.72542	-3.72049	-1.90908	undetectable
28.0006	hsa-miR-325	undetectable	-2.32619	undetectable	-0.305397	undetectable	-2.5471	-3.11881	undetectable	undetectable	undetectable	undetectable	undetectable	-3.02674	-2.20309	-3.49574	undetectable	-3.1976	0.13899	undetectable	undetectable	3.75847	undetectable	-0.495093	-2.96437	-4.55123	undetectable	undetectable	undetectable	undetectable	undetectable	undetectable	-2.71986	undetectable	undetectable	undetectable	-0.120382	-2.09982	-0.344252	-1.66991	-1.61507	-2.32934	undetectable	-2.56375	undetectable	-3.22219	-3.87914	undetectable	undetectable
28.0004	hsa-miR-338	undetectable	undetectable	undetectable	undetectable	undetectable	undetectable	-2.00766	undetectable	-2.08379	-2.12064	1.66724	undetectable	-0.903861	-3.40813	-3.64372	undetectable	undetectable	1.55975	-2.73353	undetectable	3.75847	undetectable	undetectable	3.43446	-3.20335	undetectable	undetectable	undetectable	-2.1993	undetectable	-3.38419	undetectable	undetectable	0.108902	undetectable	undetectable	-4.39619	-2.26248	undetectable	undetectable	undetectable	-2.4616	undetectable	undetectable	0.806437	-2.51084	-0.559533	undetectable
27.0006	hsa-miR-150	undetectable	-1.11383	undetectable	-1.44793	undetectable	-1.65511	4.53693	-3.4191	undetectable	undetectable	2.91532	-3.48829	-3.75036	undetectable	undetectable	undetectable	-4.51071	-2.425	undetectable	undetectable	-4.82445	undetectable	undetectable	undetectable	undetectable	-3.50455	-3.82572	-0.413903	undetectable	undetectable	undetectable	undetectable	undetectable	-3.118	undetectable	-3.4394	undetectable	-4.21652	undetectable	3.36404	undetectable	-4.582	undetectable	undetectable	undetectable	undetectable	undetectable	undetectable
22.0007	hsa-miR-185	undetectable	undetectable	undetectable	-0.806914	undetectable	-2.81045	undetectable	undetectable	-3.84611	undetectable	undetectable	-3.83349	undetectable	-3.39681	undetectable	undetectable	undetectable	undetectable	undetectable	-0.290514	-4.54807	undetectable	undetectable	-2.46201	-3.21115	undetectable	-3.72006	undetectable	undetectable	undetectable	-4.11884	-4.41912	undetectable	-4.21241	undetectable	-2.58898	-3.49454	undetectable	undetectable	-1.94807	undetectable	undetectable	undetectable	undetectable	undetectable	-2.18373	-3.33725	undetectable
22.0003	hsa-miR-382	undetectable	undetectable	-2.52032	-1.43289	-1.69545	undetectable	undetectable	undetectable	undetectable	undetectable	undetectable	undetectable	undetectable	undetectable	-2.69393	undetectable	0.829842	undetectable	undetectable	undetectable	3.75847	undetectable	undetectable	undetectable	-2.24505	undetectable	undetectable	undetectable	undetectable	0.145115	-0.650169	undetectable	undetectable	undetectable	undetectable	undetectable	undetectable	-4.13246	-2.78763	-3.34966	-3.31393	1.54249	0.888061	-0.587271	undetectable	undetectable	-3.62323	-4.23059
21.0002	hsa-miR-211	undetectable	undetectable	undetectable	-1.37449	undetectable	-2.19808	-1.33007	undetectable	undetectable	undetectable	undetectable	undetectable	undetectable	undetectable	-4.33573	-2.27893	undetectable	undetectable	-1.51177	undetectable	-5.85759	undetectable	4.77729	4.94038	undetectable	-2.33446	1.92313	undetectable	undetectable	undetectable	-1.35417	-3.49451	undetectable	undetectable	undetectable	undetectable	undetectable	undetectable	undetectable	-2.07615	undetectable	undetectable	undetectable	undetectable	-2.64472	4.40746	5.85054	undetectable
20.0005	hsa-miR-34b	undetectable	-3.79825	undetectable	-2.11943	undetectable	undetectable	undetectable	undetectable	-1.1905	undetectable	undetectable	undetectable	undetectable	undetectable	-3.47202	-1.83034	-2.66848	undetectable	undetectable	undetectable	3.75847	undetectable	undetectable	undetectable	undetectable	-1.92596	undetectable	undetectable	-1.88062	-3.52924	-4.08628	undetectable	undetectable	undetectable	undetectable	undetectable	undetectable	-1.02449	undetectable	undetectable	-4.125	undetectable	undetectable	undetectable	-2.18605	undetectable	undetectable	undetectable
18.9999	hsa-miR-142-5p	undetectable	undetectable	undetectable	undetectable	undetectable	undetectable	5.49559	3.35227	undetectable	undetectable	-2.80836	-3.81492	-3.10903	6.23783	undetectable	0.217532	undetectable	undetectable	undetectable	4.73383	undetectable	-0.508499	undetectable	-0.383311	undetectable	undetectable	undetectable	5.43862	-2.00289	undetectable	undetectable	undetectable	undetectable	undetectable	undetectable	undetectable	undetectable	-1.06041	undetectable	4.37399	undetectable	undetectable	undetectable	undetectable	-3.43619	undetectable	undetectable	undetectable
18.0006	hsa-miR-153	undetectable	undetectable	undetectable	undetectable	undetectable	undetectable	-1.09752	-3.47311	undetectable	-4.21492	-3.47203	-2.76587	-4.45162	undetectable	undetectable	undetectable	undetectable	undetectable	undetectable	undetectable	undetectable	undetectable	undetectable	-4.24775	undetectable	undetectable	undetectable	-1.0471	-2.8779	undetectable	-2.68714	undetectable	undetectable	undetectable	undetectable	undetectable	-2.97277	-2.23304	-1.79412	undetectable	undetectable	-5.07099	undetectable	undetectable	undetectable	undetectable	undetectable	undetectable
18	hsa-miR-127	undetectable	undetectable	-0.656529	0.587602	-0.684779	undetectable	undetectable	undetectable	undetectable	undetectable	undetectable	undetectable	undetectable	undetectable	-1.26221	undetectable	1.96224	undetectable	undetectable	-2.91276	undetectable	undetectable	undetectable	undetectable	-0.789336	undetectable	undetectable	undetectable	undetectable	2.73256	0.684442	undetectable	-2.77965	-3.14156	undetectable	undetectable	undetectable	undetectable	undetectable	-4.74735	undetectable	3.57033	2.16465	0.903257	undetectable	undetectable	undetectable	undetectable
17.0002	hsa-miR-34c	undetectable	-3.55631	undetectable	-0.666236	undetectable	undetectable	undetectable	undetectable	-0.337401	undetectable	undetectable	undetectable	undetectable	undetectable	-2.85896	-0.0512623	-2.02427	undetectable	undetectable	undetectable	3.75847	undetectable	undetectable	undetectable	undetectable	-0.040579	undetectable	undetectable	-1.08383	-2.95803	-3.17054	undetectable	undetectable	undetectable	undetectable	undetectable	undetectable	-0.0981788	undetectable	undetectable	undetectable	undetectable	undetectable	undetectable	-1.3799	undetectable	undetectable	undetectable
16.0005	hsa-miR-187	undetectable	undetectable	undetectable	undetectable	undetectable	undetectable	undetectable	undetectable	-2.63537	-4.04562	undetectable	-3.75733	undetectable	undetectable	undetectable	undetectable	undetectable	undetectable	undetectable	undetectable	undetectable	undetectable	undetectable	-3.49999	undetectable	undetectable	undetectable	undetectable	undetectable	undetectable	-3.90781	-3.20732	undetectable	undetectable	-4.20831	-3.92542	undetectable	undetectable	undetectable	-3.82468	undetectable	undetectable	-3.11812	undetectable	-1.41812	undetectable	0.967939	undetectable
15.0005	hsa-miR-138	-3.48494	undetectable	-2.98719	undetectable	undetectable	undetectable	undetectable	undetectable	-3.98848	undetectable	undetectable	undetectable	undetectable	undetectable	-4.03335	undetectable	undetectable	undetectable	undetectable	undetectable	undetectable	undetectable	undetectable	undetectable	undetectable	-3.00802	undetectable	undetectable	undetectable	undetectable	undetectable	-3.39668	undetectable	undetectable	undetectable	undetectable	undetectable	undetectable	undetectable	2.49857	-3.86092	-3.03536	undetectable	undetectable	undetectable	-3.81005	undetectable	undetectable
15.0004	hsa-miR-373	-4.14634	undetectable	undetectable	-1.86665	undetectable	-2.64493	undetectable	undetectable	undetectable	undetectable	undetectable	undetectable	2.81716	undetectable	undetectable	undetectable	undetectable	undetectable	undetectable	-2.0093	3.75847	undetectable	undetectable	undetectable	undetectable	undetectable	undetectable	undetectable	undetectable	undetectable	undetectable	-4.48632	undetectable	-4.07131	undetectable	-4.05934	-4.57908	undetectable	-3.83166	-3.10275	undetectable	undetectable	undetectable	undetectable	undetectable	undetectable	undetectable	undetectable
15.0002	hsa-miR-323	undetectable	undetectable	-2.65197	-1.88086	-3.23663	undetectable	undetectable	undetectable	undetectable	undetectable	undetectable	undetectable	undetectable	undetectable	-3.32668	undetectable	-1.19212	undetectable	undetectable	undetectable	3.75847	undetectable	undetectable	undetectable	-2.69718	undetectable	undetectable	undetectable	undetectable	-0.781022	-0.330655	undetectable	undetectable	undetectable	undetectable	undetectable	undetectable	undetectable	undetectable	undetectable	-4.13091	0.794092	-1.13636	-1.76098	undetectable	undetectable	undetectable	undetectable
14.9998	hsa-miR-223	undetectable	-0.605388	undetectable	undetectable	undetectable	undetectable	8.7527	undetectable	undetectable	undetectable	undetectable	undetectable	undetectable	10.1046	undetectable	undetectable	undetectable	undetectable	-2.95251	8.1978	undetectable	undetectable	undetectable	3.25467	-2.60556	undetectable	undetectable	4.06729	undetectable	undetectable	undetectable	undetectable	undetectable	undetectable	undetectable	undetectable	undetectable	undetectable	undetectable	-3.85507	undetectable	-3.01464	undetectable	undetectable	undetectable	undetectable	undetectable	-2.44497
14.0002	hsa-miR-299	undetectable	undetectable	-3.63458	-1.05938	-1.7049	undetectable	undetectable	undetectable	undetectable	undetectable	undetectable	undetectable	undetectable	undetectable	-3.68658	undetectable	0.955788	undetectable	undetectable	undetectable	undetectable	undetectable	undetectable	undetectable	-3.92907	undetectable	undetectable	undetectable	undetectable	-1.62008	-1.86282	undetectable	undetectable	undetectable	undetectable	undetectable	undetectable	undetectable	-4.10568	undetectable	undetectable	0.794025	0.196768	-1.34211	undetectable	undetectable	undetectable	undetectable
13.9999	hsa-miR-205	undetectable	undetectable	undetectable	undetectable	undetectable	undetectable	undetectable	undetectable	undetectable	undetectable	undetectable	undetectable	undetectable	undetectable	2.0064	undetectable	undetectable	6.25845	undetectable	undetectable	undetectable	undetectable	0.814943	undetectable	-1.37058	undetectable	undetectable	undetectable	undetectable	undetectable	undetectable	7.7355	undetectable	undetectable	3.17517	-0.8086	-3.70593	undetectable	undetectable	undetectable	-2.01876	undetectable	undetectable	undetectable	undetectable	-2.39084	undetectable	-2.57086
13.0001	hsa-miR-214	undetectable	undetectable	undetectable	undetectable	-4.19156	undetectable	undetectable	-3.08353	undetectable	undetectable	undetectable	undetectable	undetectable	undetectable	undetectable	undetectable	5.54751	undetectable	0.59392	undetectable	undetectable	undetectable	undetectable	undetectable	undetectable	undetectable	undetectable	undetectable	undetectable	undetectable	undetectable	undetectable	undetectable	-4.07936	0.426578	undetectable	undetectable	undetectable	-4.44227	-2.96443	undetectable	undetectable	undetectable	7.29029	-1.61193	-0.604768	undetectable	undetectable
12.0003	hsa-miR-184	undetectable	undetectable	undetectable	undetectable	undetectable	undetectable	-3.64003	undetectable	undetectable	undetectable	undetectable	undetectable	undetectable	undetectable	undetectable	undetectable	undetectable	undetectable	undetectable	undetectable	undetectable	undetectable	undetectable	-3.05978	-3.00086	undetectable	undetectable	undetectable	-3.22661	-2.48143	undetectable	-1.82866	undetectable	undetectable	undetectable	undetectable	undetectable	-1.26891	undetectable	-3.31046	undetectable	undetectable	undetectable	undetectable	-2.6445	-3.59742	undetectable	undetectable
12.0002	hsa-miR-376a	undetectable	undetectable	-3.68106	-2.07298	-4.38554	undetectable	undetectable	undetectable	undetectable	undetectable	undetectable	undetectable	undetectable	undetectable	undetectable	undetectable	-3.62311	undetectable	undetectable	undetectable	3.75847	undetectable	undetectable	undetectable	undetectable	undetectable	undetectable	undetectable	undetectable	-1.92923	-2.52163	undetectable	undetectable	undetectable	undetectable	undetectable	undetectable	undetectable	undetectable	undetectable	undetectable	-0.703318	-2.10182	-3.04405	undetectable	undetectable	undetectable	undetectable
12.0002	hsa-miR-379	undetectable	undetectable	undetectable	-2.46035	-3.85235	undetectable	undetectable	undetectable	undetectable	undetectable	undetectable	undetectable	undetectable	undetectable	undetectable	undetectable	-0.918665	undetectable	undetectable	undetectable	3.75847	undetectable	undetectable	undetectable	-4.10269	undetectable	undetectable	undetectable	undetectable	-2.61072	-2.46874	undetectable	undetectable	undetectable	undetectable	undetectable	undetectable	undetectable	undetectable	undetectable	undetectable	-0.491463	-1.65481	-2.7707	undetectable	undetectable	undetectable	undetectable
11.0002	hsa-miR-134	undetectable	undetectable	-3.11293	-2.96428	-4.29512	undetectable	undetectable	undetectable	undetectable	undetectable	undetectable	undetectable	undetectable	undetectable	undetectable	undetectable	-2.12692	undetectable	undetectable	undetectable	undetectable	undetectable	undetectable	undetectable	undetectable	undetectable	undetectable	undetectable	undetectable	-3.24377	-1.93002	undetectable	undetectable	undetectable	undetectable	undetectable	undetectable	undetectable	undetectable	undetectable	undetectable	0.0391423	-1.0759	-1.56873	undetectable	undetectable	undetectable	undetectable
11.0002	hsa-miR-370	undetectable	undetectable	-3.4912	undetectable	-3.61886	undetectable	undetectable	undetectable	undetectable	undetectable	undetectable	undetectable	undetectable	undetectable	undetectable	undetectable	-4.59099	undetectable	undetectable	undetectable	3.75847	undetectable	undetectable	undetectable	undetectable	undetectable	undetectable	undetectable	undetectable	-3.41823	-1.95621	undetectable	undetectable	undetectable	undetectable	undetectable	undetectable	undetectable	undetectable	undetectable	undetectable	0.00438005	-1.96789	-1.50799	undetectable	undetectable	undetectable	undetectable
11.0002	hsa-miR-215	undetectable	undetectable	-0.121213	undetectable	undetectable	undetectable	undetectable	0.356454	-4.16411	undetectable	1.44409	undetectable	-4.21651	undetectable	undetectable	undetectable	undetectable	-1.02245	undetectable	-3.24623	2.05535	undetectable	undetectable	undetectable	undetectable	undetectable	undetectable	undetectable	undetectable	undetectable	undetectable	undetectable	undetectable	undetectable	undetectable	undetectable	-3.14947	undetectable	undetectable	undetectable	undetectable	undetectable	undetectable	undetectable	undetectable	undetectable	undetectable	undetectable
10.0003	hsa-miR-326	undetectable	undetectable	undetectable	undetectable	undetectable	undetectable	undetectable	undetectable	undetectable	undetectable	undetectable	undetectable	-4.13237	undetectable	undetectable	undetectable	undetectable	undetectable	-3.86354	undetectable	3.75847	undetectable	undetectable	undetectable	undetectable	undetectable	undetectable	undetectable	undetectable	undetectable	-3.89068	-3.93431	undetectable	-3.69537	undetectable	-4.31654	-4.28188	undetectable	undetectable	undetectable	undetectable	undetectable	undetectable	undetectable	undetectable	undetectable	-3.60822	undetectable
10.0003	hsa-miR-128b	undetectable	undetectable	undetectable	-3.78589	undetectable	-3.71511	-0.43686	undetectable	undetectable	undetectable	undetectable	undetectable	undetectable	undetectable	undetectable	undetectable	undetectable	undetectable	undetectable	undetectable	-6.16721	undetectable	undetectable	undetectable	undetectable	undetectable	undetectable	0.0361038	undetectable	undetectable	undetectable	undetectable	undetectable	undetectable	undetectable	undetectable	undetectable	undetectable	undetectable	-0.151364	undetectable	undetectable	undetectable	undetectable	undetectable	undetectable	undetectable	undetectable
8.00029	hsa-miR-1	undetectable	-4.17826	undetectable	undetectable	undetectable	undetectable	undetectable	undetectable	undetectable	undetectable	undetectable	undetectable	undetectable	undetectable	undetectable	undetectable	undetectable	undetectable	undetectable	undetectable	undetectable	undetectable	undetectable	-1.8373	undetectable	undetectable	undetectable	undetectable	undetectable	undetectable	-3.87427	undetectable	undetectable	undetectable	undetectable	-3.79351	undetectable	undetectable	undetectable	undetectable	-4.1413	undetectable	undetectable	undetectable	undetectable	undetectable	undetectable	undetectable
8.00023	hsa-miR-108	undetectable	undetectable	undetectable	-1.19944	undetectable	-3.73292	undetectable	undetectable	undetectable	undetectable	undetectable	undetectable	undetectable	undetectable	undetectable	undetectable	undetectable	undetectable	undetectable	undetectable	undetectable	undetectable	undetectable	undetectable	undetectable	undetectable	undetectable	undetectable	undetectable	undetectable	undetectable	-4.64686	undetectable	undetectable	undetectable	-0.24948	undetectable	undetectable	undetectable	-2.45286	undetectable	undetectable	undetectable	undetectable	undetectable	undetectable	undetectable	undetectable
8.00005	hsa-miR-199a	undetectable	undetectable	undetectable	undetectable	undetectable	undetectable	undetectable	undetectable	undetectable	undetectable	undetectable	undetectable	undetectable	undetectable	undetectable	undetectable	3.9432	undetectable	-1.72645	undetectable	undetectable	-1.62566	undetectable	undetectable	undetectable	undetectable	undetectable	undetectable	undetectable	undetectable	undetectable	undetectable	undetectable	undetectable	-1.63253	undetectable	undetectable	undetectable	undetectable	undetectable	undetectable	undetectable	undetectable	5.24141	undetectable	-3.08371	undetectable	undetectable
7.00023	hsa-miR-133a	undetectable	-3.97961	undetectable	undetectable	undetectable	undetectable	undetectable	undetectable	undetectable	undetectable	undetectable	undetectable	undetectable	undetectable	undetectable	undetectable	undetectable	undetectable	undetectable	undetectable	undetectable	undetectable	undetectable	-1.71552	undetectable	undetectable	undetectable	undetectable	undetectable	undetectable	undetectable	undetectable	undetectable	undetectable	undetectable	-2.53321	undetectable	undetectable	undetectable	undetectable	-3.33747	undetectable	undetectable	undetectable	undetectable	undetectable	undetectable	undetectable
7.00012	hsa-miR-143	undetectable	undetectable	undetectable	undetectable	undetectable	undetectable	undetectable	undetectable	undetectable	undetectable	undetectable	undetectable	undetectable	undetectable	undetectable	undetectable	0.703977	undetectable	undetectable	undetectable	undetectable	undetectable	undetectable	undetectable	undetectable	undetectable	undetectable	undetectable	undetectable	undetectable	undetectable	undetectable	undetectable	undetectable	undetectable	-0.84183	undetectable	undetectable	undetectable	undetectable	-3.73757	-4.70561	undetectable	0.506072	undetectable	undetectable	undetectable	undetectable
6.00022	hsa-miR-129	undetectable	undetectable	undetectable	undetectable	undetectable	undetectable	undetectable	undetectable	undetectable	undetectable	undetectable	undetectable	undetectable	-2.6497	undetectable	undetectable	-4.87306	undetectable	undetectable	undetectable	undetectable	-2.08549	undetectable	undetectable	undetectable	undetectable	undetectable	undetectable	-3.642	undetectable	undetectable	-4.44394	undetectable	undetectable	undetectable	undetectable	undetectable	undetectable	undetectable	undetectable	undetectable	undetectable	undetectable	undetectable	undetectable	-4.09984	undetectable	undetectable
5.00022	hsa-miR-189	undetectable	undetectable	undetectable	undetectable	undetectable	undetectable	undetectable	undetectable	undetectable	-4.43287	undetectable	undetectable	undetectable	undetectable	undetectable	undetectable	undetectable	undetectable	-3.77001	undetectable	undetectable	undetectable	undetectable	undetectable	undetectable	undetectable	undetectable	undetectable	undetectable	undetectable	undetectable	undetectable	undetectable	undetectable	-4.4645	undetectable	undetectable	undetectable	undetectable	undetectable	undetectable	undetectable	undetectable	undetectable	undetectable	undetectable	undetectable	undetectable
5.00016	hsa-miR-128a	-4.59455	undetectable	undetectable	undetectable	undetectable	undetectable	-1.43084	undetectable	undetectable	undetectable	undetectable	undetectable	undetectable	undetectable	undetectable	undetectable	undetectable	undetectable	undetectable	undetectable	undetectable	undetectable	undetectable	undetectable	undetectable	undetectable	undetectable	-0.868328	undetectable	undetectable	undetectable	undetectable	undetectable	-4.77978	undetectable	undetectable	undetectable	undetectable	undetectable	undetectable	undetectable	undetectable	undetectable	undetectable	undetectable	undetectable	undetectable	undetectable
5.00013	hsa-miR-124a	undetectable	undetectable	undetectable	undetectable	undetectable	undetectable	undetectable	undetectable	undetectable	undetectable	undetectable	undetectable	undetectable	-0.0212181	undetectable	undetectable	undetectable	undetectable	undetectable	undetectable	undetectable	undetectable	undetectable	undetectable	undetectable	undetectable	undetectable	undetectable	undetectable	undetectable	undetectable	undetectable	-1.71983	-4.42521	undetectable	undetectable	undetectable	undetectable	undetectable	undetectable	undetectable	-4.97468	undetectable	undetectable	undetectable	undetectable	undetectable	undetectable
5.0001	hsa-miR-369	undetectable	undetectable	undetectable	undetectable	undetectable	undetectable	undetectable	undetectable	undetectable	undetectable	undetectable	undetectable	undetectable	undetectable	undetectable	undetectable	-4.71882	undetectable	undetectable	undetectable	3.75847	undetectable	undetectable	undetectable	undetectable	undetectable	undetectable	undetectable	undetectable	-4.24141	undetectable	undetectable	undetectable	undetectable	undetectable	undetectable	undetectable	undetectable	undetectable	undetectable	undetectable	-2.25012	undetectable	undetectable	undetectable	undetectable	undetectable	undetectable
5	hsa-miR-199b	undetectable	undetectable	undetectable	undetectable	undetectable	undetectable	-3.87469	undetectable	undetectable	undetectable	undetectable	undetectable	undetectable	1.63052	undetectable	undetectable	1.38797	undetectable	undetectable	undetectable	undetectable	undetectable	undetectable	undetectable	undetectable	undetectable	undetectable	undetectable	undetectable	undetectable	undetectable	undetectable	undetectable	undetectable	undetectable	undetectable	undetectable	undetectable	undetectable	undetectable	undetectable	undetectable	undetectable	2.19399	undetectable	undetectable	undetectable	undetectable
4.00017	hsa-miR-219	undetectable	undetectable	undetectable	undetectable	undetectable	undetectable	undetectable	undetectable	undetectable	undetectable	undetectable	undetectable	undetectable	undetectable	undetectable	undetectable	undetectable	undetectable	undetectable	undetectable	undetectable	undetectable	undetectable	undetectable	-4.55778	undetectable	undetectable	undetectable	undetectable	undetectable	undetectable	undetectable	undetectable	-4.45022	undetectable	undetectable	undetectable	undetectable	undetectable	-2.82195	undetectable	undetectable	undetectable	undetectable	undetectable	undetectable	undetectable	undetectable
4.00009	hsa-miR-381	undetectable	undetectable	undetectable	undetectable	undetectable	undetectable	undetectable	undetectable	undetectable	undetectable	undetectable	undetectable	undetectable	undetectable	undetectable	undetectable	undetectable	undetectable	undetectable	undetectable	3.75847	undetectable	undetectable	undetectable	undetectable	undetectable	undetectable	undetectable	undetectable	undetectable	undetectable	undetectable	undetectable	undetectable	undetectable	undetectable	undetectable	undetectable	undetectable	undetectable	undetectable	-3.86958	undetectable	undetectable	undetectable	undetectable	undetectable	undetectable
4.00009	hsa-miR-337	undetectable	undetectable	undetectable	undetectable	undetectable	undetectable	undetectable	undetectable	undetectable	undetectable	undetectable	undetectable	undetectable	undetectable	undetectable	undetectable	-3.47493	undetectable	undetectable	undetectable	3.75847	undetectable	undetectable	undetectable	undetectable	undetectable	undetectable	undetectable	undetectable	undetectable	undetectable	undetectable	undetectable	undetectable	undetectable	undetectable	undetectable	undetectable	undetectable	undetectable	undetectable	-4.78904	undetectable	undetectable	undetectable	undetectable	undetectable	undetectable
4.00001	hsa-miR-372	undetectable	undetectable	undetectable	undetectable	undetectable	undetectable	undetectable	undetectable	undetectable	undetectable	undetectable	undetectable	2.96496	undetectable	undetectable	undetectable	undetectable	undetectable	undetectable	undetectable	3.75847	undetectable	undetectable	undetectable	undetectable	undetectable	undetectable	undetectable	undetectable	undetectable	undetectable	-4.78357	undetectable	undetectable	undetectable	undetectable	undetectable	undetectable	undetectable	undetectable	undetectable	undetectable	undetectable	undetectable	undetectable	undetectable	undetectable	undetectable
3.00005	hsa-miR-377	undetectable	undetectable	undetectable	undetectable	undetectable	undetectable	undetectable	undetectable	undetectable	undetectable	undetectable	undetectable	undetectable	undetectable	undetectable	undetectable	undetectable	undetectable	undetectable	undetectable	3.75847	undetectable	undetectable	undetectable	undetectable	undetectable	undetectable	undetectable	undetectable	undetectable	undetectable	undetectable	undetectable	undetectable	undetectable	undetectable	undetectable	undetectable	undetectable	undetectable	undetectable	-3.78919	undetectable	undetectable	undetectable	undetectable	undetectable	undetectable
2.99995	hsa-miR-367	undetectable	undetectable	undetectable	undetectable	undetectable	undetectable	undetectable	undetectable	undetectable	undetectable	undetectable	undetectable	undetectable	undetectable	undetectable	undetectable	undetectable	undetectable	4.35334	undetectable	3.75847	undetectable	undetectable	undetectable	undetectable	undetectable	undetectable	undetectable	undetectable	undetectable	undetectable	undetectable	undetectable	-3.58211	undetectable	undetectable	undetectable	undetectable	undetectable	undetectable	undetectable	undetectable	undetectable	undetectable	undetectable	undetectable	undetectable	undetectable
2.00008	hsa-miR-154	undetectable	undetectable	undetectable	undetectable	undetectable	undetectable	undetectable	undetectable	undetectable	undetectable	undetectable	undetectable	undetectable	undetectable	undetectable	undetectable	undetectable	undetectable	undetectable	undetectable	undetectable	undetectable	undetectable	undetectable	undetectable	undetectable	undetectable	undetectable	undetectable	undetectable	undetectable	undetectable	undetectable	undetectable	undetectable	undetectable	undetectable	undetectable	undetectable	undetectable	undetectable	-3.94566	undetectable	undetectable	undetectable	undetectable	undetectable	undetectable
2.00002	hsa-miR-302c	undetectable	undetectable	undetectable	undetectable	undetectable	undetectable	undetectable	undetectable	undetectable	undetectable	undetectable	undetectable	undetectable	undetectable	undetectable	undetectable	undetectable	undetectable	1.65532	undetectable	undetectable	undetectable	undetectable	undetectable	undetectable	undetectable	undetectable	undetectable	undetectable	undetectable	undetectable	undetectable	undetectable	-4.04766	undetectable	undetectable	undetectable	undetectable	undetectable	undetectable	undetectable	undetectable	undetectable	undetectable	undetectable	undetectable	undetectable	undetectable
2.00001	hsa-miR-302a	undetectable	undetectable	undetectable	undetectable	undetectable	undetectable	undetectable	undetectable	undetectable	undetectable	undetectable	undetectable	undetectable	undetectable	undetectable	undetectable	undetectable	undetectable	3.28257	undetectable	undetectable	undetectable	undetectable	undetectable	undetectable	undetectable	undetectable	undetectable	undetectable	undetectable	undetectable	undetectable	undetectable	-4.06656	undetectable	undetectable	undetectable	undetectable	undetectable	undetectable	undetectable	undetectable	undetectable	undetectable	undetectable	undetectable	undetectable	undetectable
2.00001	hsa-miR-302d	undetectable	undetectable	undetectable	undetectable	undetectable	undetectable	undetectable	undetectable	undetectable	undetectable	undetectable	undetectable	undetectable	undetectable	undetectable	undetectable	undetectable	undetectable	2.97852	undetectable	undetectable	undetectable	undetectable	undetectable	undetectable	undetectable	undetectable	undetectable	undetectable	undetectable	undetectable	undetectable	undetectable	-3.64718	undetectable	undetectable	undetectable	undetectable	undetectable	undetectable	undetectable	undetectable	undetectable	undetectable	undetectable	undetectable	undetectable	undetectable
1.99999	hsa-miR-380-5p	undetectable	undetectable	undetectable	-3.06843	undetectable	undetectable	undetectable	undetectable	undetectable	undetectable	undetectable	undetectable	undetectable	undetectable	undetectable	undetectable	undetectable	undetectable	undetectable	undetectable	3.75847	undetectable	undetectable	undetectable	undetectable	undetectable	undetectable	undetectable	undetectable	undetectable	undetectable	undetectable	undetectable	undetectable	undetectable	undetectable	undetectable	undetectable	undetectable	undetectable	undetectable	undetectable	undetectable	undetectable	undetectable	undetectable	undetectable	undetectable
1.99999	hsa-miR-383	undetectable	undetectable	undetectable	undetectable	undetectable	undetectable	undetectable	undetectable	undetectable	undetectable	undetectable	undetectable	undetectable	undetectable	undetectable	undetectable	undetectable	undetectable	undetectable	undetectable	3.75847	undetectable	undetectable	undetectable	undetectable	undetectable	undetectable	undetectable	undetectable	undetectable	undetectable	undetectable	undetectable	undetectable	undetectable	undetectable	undetectable	undetectable	undetectable	undetectable	undetectable	undetectable	-2.56713	undetectable	undetectable	undetectable	undetectable	undetectable
1.99999	hsa-miR-302b	undetectable	undetectable	undetectable	undetectable	undetectable	undetectable	undetectable	undetectable	undetectable	undetectable	undetectable	undetectable	undetectable	undetectable	undetectable	undetectable	undetectable	undetectable	4.2314	undetectable	undetectable	undetectable	undetectable	undetectable	undetectable	undetectable	undetectable	undetectable	undetectable	undetectable	undetectable	undetectable	undetectable	-2.8518	undetectable	undetectable	undetectable	undetectable	undetectable	undetectable	undetectable	undetectable	undetectable	undetectable	undetectable	undetectable	undetectable	undetectable
1.99996	hsa-miR-371	undetectable	undetectable	undetectable	undetectable	undetectable	undetectable	undetectable	undetectable	undetectable	undetectable	undetectable	undetectable	-0.173372	undetectable	undetectable	undetectable	undetectable	undetectable	undetectable	undetectable	3.75847	undetectable	undetectable	undetectable	undetectable	undetectable	undetectable	undetectable	undetectable	undetectable	undetectable	undetectable	undetectable	undetectable	undetectable	undetectable	undetectable	undetectable	undetectable	undetectable	undetectable	undetectable	undetectable	undetectable	undetectable	undetectable	undetectable	undetectable
1.00004	hsa-miR-104	undetectable	undetectable	undetectable	undetectable	undetectable	-4.18288	undetectable	undetectable	undetectable	undetectable	undetectable	undetectable	undetectable	undetectable	undetectable	undetectable	undetectable	undetectable	undetectable	undetectable	undetectable	undetectable	undetectable	undetectable	undetectable	undetectable	undetectable	undetectable	undetectable	undetectable	undetectable	undetectable	undetectable	undetectable	undetectable	undetectable	undetectable	undetectable	undetectable	undetectable	undetectable	undetectable	undetectable	undetectable	undetectable	undetectable	undetectable	undetectable
1.00004	hsa-miR-216	undetectable	undetectable	undetectable	undetectable	undetectable	undetectable	undetectable	undetectable	undetectable	undetectable	undetectable	undetectable	undetectable	undetectable	-3.72089	undetectable	undetectable	undetectable	undetectable	undetectable	undetectable	undetectable	undetectable	undetectable	undetectable	undetectable	undetectable	undetectable	undetectable	undetectable	undetectable	undetectable	undetectable	undetectable	undetectable	undetectable	undetectable	undetectable	undetectable	undetectable	undetectable	undetectable	undetectable	undetectable	undetectable	undetectable	undetectable	undetectable
1.00003	hsa-miR-198	undetectable	undetectable	undetectable	undetectable	undetectable	undetectable	undetectable	undetectable	undetectable	undetectable	undetectable	undetectable	undetectable	undetectable	undetectable	undetectable	undetectable	undetectable	undetectable	undetectable	undetectable	undetectable	undetectable	undetectable	undetectable	undetectable	undetectable	undetectable	undetectable	undetectable	undetectable	undetectable	undetectable	undetectable	undetectable	undetectable	undetectable	undetectable	undetectable	-3.28548	undetectable	undetectable	undetectable	undetectable	undetectable	undetectable	undetectable	undetectable
1.00002	hsa-miR-136	undetectable	undetectable	undetectable	undetectable	undetectable	undetectable	undetectable	undetectable	undetectable	undetectable	undetectable	undetectable	undetectable	undetectable	undetectable	undetectable	undetectable	undetectable	undetectable	undetectable	undetectable	undetectable	undetectable	undetectable	undetectable	undetectable	undetectable	undetectable	undetectable	undetectable	undetectable	undetectable	undetectable	undetectable	undetectable	undetectable	undetectable	undetectable	undetectable	undetectable	undetectable	undetectable	undetectable	undetectable	undetectable	undetectable	undetectable	undetectable
1.00002	hsa-miR-147	undetectable	undetectable	undetectable	undetectable	undetectable	undetectable	undetectable	undetectable	undetectable	undetectable	undetectable	undetectable	undetectable	undetectable	undetectable	undetectable	undetectable	undetectable	undetectable	undetectable	undetectable	undetectable	undetectable	undetectable	undetectable	undetectable	undetectable	undetectable	undetectable	undetectable	-2.06759	undetectable	undetectable	undetectable	undetectable	undetectable	undetectable	undetectable	undetectable	undetectable	undetectable	undetectable	undetectable	undetectable	undetectable	undetectable	undetectable	undetectable
0.999962	hsa-miR-368	undetectable	undetectable	undetectable	undetectable	undetectable	undetectable	undetectable	undetectable	undetectable	undetectable	undetectable	undetectable	undetectable	undetectable	undetectable	undetectable	undetectable	undetectable	undetectable	undetectable	3.75847	undetectable	undetectable	undetectable	undetectable	undetectable	undetectable	undetectable	undetectable	undetectable	undetectable	undetectable	undetectable	undetectable	undetectable	undetectable	undetectable	undetectable	undetectable	undetectable	undetectable	undetectable	undetectable	undetectable	undetectable	undetectable	undetectable	undetectable
0.999962	hsa-miR-380-3p	undetectable	undetectable	undetectable	undetectable	undetectable	undetectable	undetectable	undetectable	undetectable	undetectable	undetectable	undetectable	undetectable	undetectable	undetectable	undetectable	undetectable	undetectable	undetectable	undetectable	3.75847	undetectable	undetectable	undetectable	undetectable	undetectable	undetectable	undetectable	undetectable	undetectable	undetectable	undetectable	undetectable	undetectable	undetectable	undetectable	undetectable	undetectable	undetectable	undetectable	undetectable	undetectable	undetectable	undetectable	undetectable	undetectable	undetectable	undetectable
0.999962	hsa-miR-384	undetectable	undetectable	undetectable	undetectable	undetectable	undetectable	undetectable	undetectable	undetectable	undetectable	undetectable	undetectable	undetectable	undetectable	undetectable	undetectable	undetectable	undetectable	undetectable	undetectable	3.75847	undetectable	undetectable	undetectable	undetectable	undetectable	undetectable	undetectable	undetectable	undetectable	undetectable	undetectable	undetectable	undetectable	undetectable	undetectable	undetectable	undetectable	undetectable	undetectable	undetectable	undetectable	undetectable	undetectable	undetectable	undetectable	undetectable	undetectable
0	hsa-miR-122a	undetectable	undetectable	undetectable	undetectable	undetectable	undetectable	undetectable	undetectable	undetectable	undetectable	undetectable	undetectable	undetectable	undetectable	undetectable	undetectable	undetectable	undetectable	undetectable	undetectable	undetectable	undetectable	undetectable	undetectable	undetectable	undetectable	undetectable	undetectable	undetectable	undetectable	undetectable	undetectable	undetectable	undetectable	undetectable	undetectable	undetectable	undetectable	undetectable	undetectable	undetectable	undetectable	undetectable	undetectable	undetectable	undetectable	undetectable	undetectable
0	hsa-miR-144	undetectable	undetectable	undetectable	undetectable	undetectable	undetectable	undetectable	undetectable	undetectable	undetectable	undetectable	undetectable	undetectable	undetectable	undetectable	undetectable	undetectable	undetectable	undetectable	undetectable	undetectable	undetectable	undetectable	undetectable	undetectable	undetectable	undetectable	undetectable	undetectable	undetectable	undetectable	undetectable	undetectable	undetectable	undetectable	undetectable	undetectable	undetectable	undetectable	undetectable	undetectable	undetectable	undetectable	undetectable	undetectable	undetectable	undetectable	undetectable
0	hsa-miR-208	undetectable	undetectable	undetectable	undetectable	undetectable	undetectable	undetectable	undetectable	undetectable	undetectable	undetectable	undetectable	undetectable	undetectable	undetectable	undetectable	undetectable	undetectable	undetectable	undetectable	undetectable	undetectable	undetectable	undetectable	undetectable	undetectable	undetectable	undetectable	undetectable	undetectable	undetectable	undetectable	undetectable	undetectable	undetectable	undetectable	undetectable	undetectable	undetectable	undetectable	undetectable	undetectable	undetectable	undetectable	undetectable	undetectable	undetectable	undetectable
0	hsa-miR-217	undetectable	undetectable	undetectable	undetectable	undetectable	undetectable	undetectable	undetectable	undetectable	undetectable	undetectable	undetectable	undetectable	undetectable	undetectable	undetectable	undetectable	undetectable	undetectable	undetectable	undetectable	undetectable	undetectable	undetectable	undetectable	undetectable	undetectable	undetectable	undetectable	undetectable	undetectable	undetectable	undetectable	undetectable	undetectable	undetectable	undetectable	undetectable	undetectable	undetectable	undetectable	undetectable	undetectable	undetectable	undetectable	undetectable	undetectable	undetectable
0	hsa-miR-220	undetectable	undetectable	undetectable	undetectable	undetectable	undetectable	undetectable	undetectable	undetectable	undetectable	undetectable	undetectable	undetectable	undetectable	undetectable	undetectable	undetectable	undetectable	undetectable	undetectable	undetectable	undetectable	undetectable	undetectable	undetectable	undetectable	undetectable	undetectable	undetectable	undetectable	undetectable	undetectable	undetectable	undetectable	undetectable	undetectable	undetectable	undetectable	undetectable	undetectable	undetectable	undetectable	undetectable	undetectable	undetectable	undetectable	undetectable	undetectable
miR-429 was found to be significantly expressed in more than 30 cell lines (data not shown)
[truncated: 12 more columns]
