# Supplementary material for: miRConnect: Identifying Effector Genes of miRNAs and miRNA Families in Cancer Cells
Source: PLoS One. 2011 Oct 26;6(10):e26521. doi: 10.1371/journal.pone.0026521 (PMC3202536; doi:10.1371/journal.pone.0026521)
Supplement: Table S2 — miRNA seed families represented in the Q data set. miRNAs in red = family members for which no data sets were available. (XLS) [file pone.0026521.s008.xls]

## Sheet: Top 30 cell lines
Table S2: miRNA seed families represented in the Q data set.
Seed Families	miRNAs expressed in >=than 30 cell lines
Let-7/miR-98	let-7a, let-7b, let-7c, let-7d, let-7e, let-7f, let-7g, let-7i, miR-98
miR-10	hsa-miR-10a, hsa-miR-10b
miR-101	hsa-miR-101
miR-103/107	hsa-miR-103, hsa-miR-107
miR-105	hsa-miR-105.h
miR-1/206	hsa-miR-206
miR-122
miR-124/506	hsa-miR-124
miR-125/351	hsa-miR-125a, hsa-miR-125b
miR-126/126-3p	hsa-miR-126
miR-130/301	hsa-miR-130a, hsa-miR-130b, hsa-miR-301a
miR-132/212	hsa-miR-132, hsa-miR-212
miR-133	hsa-miR-133b
miR-135	hsa-miR-135a, hsa-miR-135b
miR-137	hsa-miR-137
miR-140	hsa-miR-140-5p
miR-141/200a	has-miR-141, hsa-miR-200a
miR-142-3p	hsa-miR-142-3p
miR-144
miR-145	hsa-miR-145
miR-146	hsa-miR-146a
miR-148/152	hsa-miR-148a, hsa-miR-148b, hsa-miR-152
miR-149	hsa-miR-149
miR-15/16/195/424/497	hsa-miR-15a, hsa-miR-15b, hsa-miR-16, hsa-miR-195, hsa-miR-424
miR-151	hsa-miR-151-3p
miR-155	hsa-miR-155
miR-17-5p/20/93.mr/106/519.d	hsa-miR-17-5p, hsa-miR-20a, hsa-miR-93, hsa-miR-106a, hsa-miR-106b
miR-181	hsa-miR-181a, hsa-miR-181b, hsa-miR-181c
miR-181*	hsa-miR-181a* (formerly hsa-miR-213)
miR-182	hsa-miR-182
miR-183	hsa-miR-183
miR-186	hsa-miR-186
miR-188/188-5p	hsa-miR-188-5p
miR-18ab	hsa-miR-18a
miR-19	hsa-miR-19a, hsa-miR-19b
miR-190	hsa-miR-190
miR-191	hsa-miR-191
miR-192/215	hsa-miR-192
miR-193ab	hsa-miR-193a-3p
miR-194	hsa-miR-194
miR-196ab	hsa-miR-196a, hsa-miR-196b
miR-197	hsa-miR-197
miR-199	hsa-199a-5p
miR-200bc/429	hsa-miR-200b, hsa-miR-200c, has-miR-429
miR-203	hsa-miR-203
miR-204/211	hsa-miR-204
miR-208/208ab
miR-210	hsa-miR-210
miR-21/590-5p	hsa-miR-21
miR-217
miR-218	hsa-miR-218
miR-22	hsa-miR-22
miR-220a
miR-221/222	hsa-miR-221, hsa-miR-222
miR-23ab	hsa-miR-23a, hsa-miR-23b
miR-24	hsa-miR-24
miR-224	hsa-miR-224
miR-25/32/92/92ab/363/367	hsa-miR-25, hsa-miR-32, hsa-miR-92a
miR-26ab/1297	hsa-miR-26a, hsa-miR-26b
miR-27ab	hsa-miR-27a, hsa-miR-27b
miR-28/28-5p/708	hsa-miR-28-5p
miR-296-5p	hsa-miR-296-5p
miR-29abc	hsa-miR-29a, hsa-miR-29b, hsa-miR-29c
miR-30a/30a-5p/30b/30b-5p/30cde/384-5p	hsa-miR-30a-5p, hsa-miR-30b, hsa-miR-30c, hsa-miR-30d, hsa-miR-30e
miR-31	hsa-miR-31
miR-320	hsa-miR-320b
miR-324-3p	hsa-miR-324-3p
miR-324-5p	hsa-miR-324-5p
miR-328	hsa-miR-328
miR-33	hsa-miR-33a
miR-330/330-3p	hsa-miR-330-3p
miR-331/331-3p	hsa-miR-331-3p
miR-335/335-5p	hsa-miR-335
miR-339-5p	hsa-miR-339-5p
miR-340*	hsa-miR-340*
miR-342/342-3p	hsa-miR-342-3p
miR-345	hsa-miR-345
miR-346	hsa-miR-346
miR-34a/34b-5p/34c/34c-5p/449/449abc/699	hsa-miR-34a
miR-361/361-5p	hsa-miR-361-5p
miR-374/374ab	hsa-miR-374a
miR-375	hsa-miR-375
miR-378*	hsa-miR-378*
miR-378/422a	hsa-miR-378, hsa-miR-422a
miR-423/423-3p	hsa-miR-423-3p
miR-425*	hsa-miR-425*
miR-7/7ab	hsa-miR-7
miR-9	hsa-miR-9
miR-95	hsa-miR-95
miR-96/1271	hsa-miR-96
miR-99ab/100	hsa-miR-99a, hsa-miR-99b, hsa-miR-100
miRNAs in red= family members for which no data sets were available
