# Supplementary material for: miRConnect: Identifying Effector Genes of miRNAs and miRNA Families in Cancer Cells
Source: PLoS One. 2011 Oct 26;6(10):e26521. doi: 10.1371/journal.pone.0026521 (PMC3202536; doi:10.1371/journal.pone.0026521)
Supplement: Table S5 — miRNAs that are part of either seed families, gene clusters or are tissue specifically expressed. (XLS) [file pone.0026521.s011.xls]

## Sheet: Seed family
Table S5: miRNAs that are part of either seed families, gene clusters or are tissue specifically expressed.
miRNA SEQUENCE	miRNA IDs	Gene cluster				Seed families		Tissue
UGAGGUAGUAGGUUGUAUAGUU	let-7a	let-7a-1/let-7f-1/let-7d	let-7a-2/100	let-7a-3/let-7b		let-7/miR-98
UGAGGUAGUAGGUUGUGUGGUU	let-7b			let-7a-3/let-7b		let-7/miR-98
UGAGGUAGUAGGUUGUAUGGUU	let-7c	let-7c/99a				let-7/miR-98
AGAGGUAGUAGGUUGCAUAGU	let-7d	let-7a-1/let-7f-1/let-7d				let-7/miR-98
UGAGGUAGGAGGUUGUAUAGU	let-7e	99b/let-7e/125a				let-7/miR-98
UGAGGUAGUAGAUUGUAUAGUU	let-7f	let-7a-1/let-7f-1/let-7d	let-7f-2/98			let-7/miR-98
UGAGGUAGUAGUUUGUACAGU	let-7g					let-7/miR-98
UGAGGUAGUAGUUUGUGCUGU	let-7i					let-7/miR-98
AACCCGUAGAUCCGAACUUGUG	miR-100		let-7a-2/100			miR-99ab/100		CNS
UACAGUACUGUGAUAACUGAAG	miR-101
AGCAGCAUUGUACAGGGCUAUGA	miR-103					miR-103/107
UCAAAUGCUCAGACUCCUGU	miR-105.h
AAAAGUGCUUACAGUGCAGGUAGC	miR-106a		106a/18b/20b/19b-2/92a-2/363			miR-17-5p/20/93.mr/106/519.d
UAAAGUGCUGACAGUGCAGAU	miR-106b	106b/93/25				miR-17-5p/20/93.mr/106/519.d
AGCAGCAUUGUACAGGGCUAUCA	miR-107					miR-103/107
UACCCUGUAGAUCCGAAUUUGUG	miR-10a							renal
UACCCUGUAGAACCGAAUUUGU	miR-10b
UUAAGGCACGCGGUGAAUGC	miR-124
UCCCUGAGACCCUUUAACCUGUG	miR-125a	99b/let-7e/125a				miR-125/351		hem
UCCCUGAGACCCUAACUUGUGA	miR-125b					miR-125/351		CNS
UCGUACCGUGAGUAAUAAUGC	miR-126
CAGUGCAAUGUUAAAAGGGCAU	miR-130a					miR-130/301
CAGUGCAAUGAUGAAAGGGCAU	miR-130b					miR-130/301
UAACAGUCUACAGCCAUGGUCG	miR-132	212/132				miR-132/212
UUGGUCCCCUUCAACCAGCUA	miR-133b	206/133b
UAUGGCUUUUUAUUCCUAUGUGA	miR-135a					miR-135
UAUGGCUUUUCAUUCCUAUGUG	miR-135b					miR-135
UAUUGCUUAAGAAUACGCGUAG	miR-137
AGUGGUUUUACCCUAUGGUAG	miR-140-5p
UAACACUGUCUGGUAAAGAUGG	miR-141	200c/141				miR-141/200a		colon
UGUAGUGUUUCCUACUUUAUGGA	miR-142-3p							hem
GUCCAGUUUUCCCAGGAAUCCCUU	miR-145
UGAGAACUGAAUUCCAUGGGUU	miR-146a							mel
UCAGUGCACUACAGAACUUUGU	miR-148a					miR-148/152		hem
UCAGUGCAUCACAGAACUUUGU	miR-148b					miR-148/152
UCUGGCUCCGUGUCUUCACUCC	miR-149
ACUAGACUGAAGCUCCUUGAGG	miR-151-3p							hem
UCAGUGCAUGACAGAACUUGGG	miR-152					miR-148/152		renal
UUAAUGCUAAUCGUGAUAGGGG	miR-155
UAGCAGCACAUAAUGGUUUGUG	miR-15a	15a/16-1				miR-15/16/195/424/497
UAGCAGCACAUCAUGGUUUACA	miR-15b		15b/16-2			miR-15/16/195/424/497
UAGCAGCACGUAAAUAUUGGCG	miR-16	15a/16-1	15b/16-2			miR-15/16/195/424/497
ACUGCAGUGAAGGCACUUGU	miR-17-3p	17/18a/19a/20a/19b-1/92a-1
CAAAGUGCUUACAGUGCAGGUAGU	miR-17-5p	17/18a/19a/20a/19b-1/92a-1				miR-17-5p/20/93.mr/106/519.d
AACAUUCAACGCUGUCGGUGAGU	miR-181a	181a-1/181b-1	181a-2/181b-2			miR-181
ACCAUCGACCGUUGAUUGUACC	miR-181a*
AACAUUCAUUGCUGUCGGUGGG	miR-181b	181a-1/181b-1	181a-2/181b-2			miR-181		colon
AACAUUCAACCUGUCGGUGAGU	miR-181c					miR-181
UUUGGCAAUGGUAGAACUCACA	miR-182	183/96/182
UAUGGCACUGGUAGAAUUCACUG	miR-183	183/96/182
CAAAGAAUUCUCCUUUUGGGCUU	miR-186
CAUCCCUUGCAUGGUGGAGGGU	miR-188-5p
UAAGGUGCAUCUAGUGCAGAUA	miR-18a	17/18a/19a/20a/19b-1/92a-1
UGAUAUGUUUGAUAUAUUAGGU	miR-190
CAACGGAAUCCCAAAAGCAGCU	miR-191	191/425
CUGACCUAUGAAUUGACAGCC	miR-192	194-2/192
AACUGGCCUACAAAGUCCCAG	miR-193a-3p
UGUAACAGCAACUCCAUGUGGA	miR-194	194-2/192						colon
UAGCAGCACAGAAAUAUUGGC	miR-195					miR-15/16/195/424/497
UAGGUAGUUUCAUGUUGUUGG	miR-196a					miR-196ab		renal
UAGGUAGUUUCCUGUUGUUGG	miR-196b					miR-196ab		renal
UUCACCACCUUCUCCACCCAGC	miR-197
CCCAGUGUUCAGACUACCUGUU	miR-199a-5p
UGUGCAAAUCUAUGCAAAACUGA	miR-19a	17/18a/19a/20a/19b-1/92a-1				miR-19
UGUGCAAAUCCAUGCAAAACUGA	miR-19b	17/18a/19a/20a/19b-1/92a-1	106a/18b/20b/19b-2/92a-2/363			miR-19
UAACACUGUCUGGUAACGAUGU	miR-200a	200b/200a/429				miR-141/200a		colon
UAAUACUGCCUGGUAAUGAUGAC	miR-200b	200b/200a/429				miR-200bc/429		colon
UAAUACUGCCGGGUAAUGAUGG	miR-200c	200c/141				miR-200bc/429		colon
GUGAAAUGUUUAGGACCACUAG	miR-203
UUCCCUUUGUCAUCCUAUGCCU	miR-204							mel
UGGAAUGUAAGGAAGUGUGUGG	miR-206	206/133b
UAAAGUGCUUAUAGUGCAGGUAG	miR-20a	17/18a/19a/20a/19b-1/92a-1				miR-17-5p/20/93.mr/106/519.d
UAGCUUAUCAGACUGAUGUUGA	miR-21
CUGUGCGUGUGACAGCGGCUGA	miR-210
UAACAGUCUCCAGUCACGGCC	miR-212	212/132				miR-132/212
UUGUGCUUGAUCUAACCAUGU	miR-218
AAGCUGCCAGUUGAAGAACUGU	miR-22
AGCUACAUUGUCUGCUGGGUUUC	miR-221	222/221				222/221
AGCUACAUCUGGCUACUGGGUCUC	miR-222	222/221				222/221
CAAGUCACUAGUGGUUCCGUUUA	miR-224
AUCACAUUGCCAGGGAUUUCC	miR-23a	23a/27a/24-2				miR-23ab
AUCACAUUGCCAGGGAUUACC	miR-23b	23b/27b/24-1				miR-23ab		hem
UGGCUCAGUUCAGCAGGAACAG	miR-24	23a/27a/24-2	23b/27b/24-1
CAUUGCACUUGUCUCGGUCUGA	miR-25	106b/93/25				miR-25/32/92/92ab/363/367
UUCAAGUAAUCCAGGAUAGGC	miR-26a					miR-26ab/1297
UUCAAGUAAUUCAGGAUAGGUU	miR-26b					miR-26ab/1297
UUCACAGUGGCUAAGUUCCGC	miR-27a	23a/27a/24-2				miR-27ab
UUCACAGUGGCUAAGUUCUGC	miR-27b	23b/27b/24-1				miR-27ab		hem
AAGGAGCUCACAGUCUAUUGAG	miR-28-5p
AGGGCCCCCCCUCAAUCCUGU	miR-296-5p							renal
UAGCACCAUCUGAAAUCGGUU	miR-29a	29b-1/29a				miR-29abc
UAGCACCAUUUGAAAUCAGUGUU	miR-29b	29b-1/29a	29b-2/29c			miR-29abc
UAGCACCAUUUGAAAUCGGU	miR-29c		29b-2/29c			miR-29abc
CAGUGCAAUAGUAUUGUCAAAGC	miR-301a					miR-130/301
CUUUCAGUCGGAUGUUUGCAGC	miR-30a-3p							colon/renal
UGUAAACAUCCUCGACUGGAAG	miR-30a-5p					miR-30a/30a-5p/30b/30b-5p/30cde/384-5p		colon
UGUAAACAUCCUACACUCAGCU	miR-30b	30d/30b				miR-30a/30a-5p/30b/30b-5p/30cde/384-5p
UGUAAACAUCCUACACUCUCAGC	miR-30c	30e/30c-1	30c-2			miR-30a/30a-5p/30b/30b-5p/30cde/384-5p		colon
UGUAAACAUCCCCGACUGGAAG	miR-30d	30d/30b				miR-30a/30a-5p/30b/30b-5p/30cde/384-5p
UGUAAACAUCCUUGACUGGA	miR-30e	30e/30c-1				miR-30a/30a-5p/30b/30b-5p/30cde/384-5p
CUUUCAGUCGGAUGUUUACAGC	miR-30e-3p	30e/30c-1
GGCAAGAUGCUGGCAUAGCUG	miR-31
UAUUGCACAUUACUAAGUUGC	miR-32					miR-25/32/92/92ab/363/367
AAAAGCUGGGUUGAGAGGGCGAA	miR-320
CCACUGCCCCAGGUGCUGCUGG	miR-324-3p
CGCAUCCCCUAGGGCAUUGGUGU	miR-324-5p
CUGGCCCUCUCUGCCCUUCCGU	miR-328							mel
GCAAAGCACACGGCCUGCAGAGA	miR-330-3p
GCCCCUGGGCCUAUCCUAGAA	miR-331-3p
UCAAGAGCAAUAACGAAAAAUGU	miR-335
UCCCUGUCCUCCAGGAGCUCA	miR-339-5p
GUGCAUUGUAGUUGCAUUG	miR-33a
UCCGUCUCAGUUACUUUAUAGCC	miR-340*
UCUCACACAGAAAUCGCACCCGUC	miR-342-3p
UGCUGACUCCUAGUCCAGGGC	miR-345
UGUCUGCCCGCAUGCCUGCCUCU	miR-346
UGGCAGUGUCUUAGCUGGUUGUU	miR-34a
UUAUCAGAAUCUCCAGGGGUAC	miR-361-5p
UUAUAAUACAACCUGAUAAGUG	miR-374a
UUUGUUCGUUCGGCUCGCGUGA	miR-375
CUGGACUUGGAGUCAGAAGGCC	miR-378					miR-378/422a
CUCCUGACUCCAGGUCCUGUGU	miR-378*							colon
CUGGACUUAGGGUCAGAAGGCC	miR-422a					miR-378/422a		mel
AGCUCGGUCUGAGGCCCCUCAG	miR-423-3p
CAGCAGCAAUUCAUGUUUUGAA	miR-424					miR-15/16/195/424/497
AUCGGGAAUGUCGUGUCCGCC	miR-425*	191/425
UAAUACUGUCUGGUAAAACCGU	miR-429	200b/200a/429				miR-200bc/429
UGGAAGACUAGUGAUUUUGUUG	miR-7
UCUUUGGUUAUCUAGCUGUAUGA	miR-9
UAUUGCACUUGUCCCGGCCUG	miR-92a	17/18a/19a/20a/19b-1/92a-1	106a/18b/20b/19b-2/92a-2/363			miR-25/32/92/92ab/363/367
AAAGUGCUGUUCGUGCAGGUAG	miR-93	106b/93/25				miR-17-5p/20/93.mr/106/519.d
UUCAACGGGUAUUUAUUGAGCA	miR-95
UUUGGCACUAGCACAUUUUUGC	miR-96	183/96/182
UGAGGUAGUAAGUUGUAUUGUU	miR-98		let-7f-2/98			let-7/miR-98
AACCCGUAGAUCCGAUCUUGUG	miR-99a	let-7c/99a				miR-99ab/100		CNS
CACCCGUAGAACCGACCUUGCG	miR-99b	99b/let-7e/125a				miR-99ab/100
